# Supplementary material for: Efficient helical columnar emitters of chiral homoleptic Pt(ii) metallomesogens for circularly polarized electroluminescence
Source: Royal Society of Chemistry journal article supplement (doi:10.1039/d4sc05781c), 2024-01-01
Supplement: d4sc05781c1.pdf [file d4sc05781c1.pdf]

## Electronic Supplementary Information for

### Efficient Helical Columnar Emitters of Chiral Homoleptic Pt(II) Metallomesogens for Circularly Polarized Electroluminescence

Guo Zou, Zhenhao Jiang, Dong Li, Qihuan Li and Yixiang Cheng\*

State Key Laboratory of Analytical Chemistry for Life Science, School of Chemistry and Chemical Engineering, Nanjing University, Nanjing 210023, China  
E-mail: yxcheng@nju.edu.cn

1. Experimental section
2. Synthetic procedures and characterization
3. UV–vis absorption and PL spectra of **S-HPt** and UV–vis absorption spectra of ligands **R/S-7**
4. Computational investigations
5. Photophysical properties
6. Thermal properties of **R/S-HPt**.
7. Chiroptical spectra of **R/S-HPt**
8. SEM images of complexes **R/S-HPt**
9. Molecular dynamics (MD) simulations data of **S-HPt-C4**
10. Cyclic voltammetry (CV) curves of complexes **R/S-HPt**
11. EL performance of homoleptic complex-based devices
12. MALDI-TOF MS spectra of homoleptic Pt(II) complexes **R/S-HPt**
13. NMR spectra of homoleptic Pt(II) complexes **R/S-HPt**
14. HPLC spectra of homoleptic Pt(II) complexes **R/S-HPt**
15. References

## 1. Experimental section

**Materials and methods.** All precursor reagents, solvents and high purity nuclear magnetic resonance (NMR) solvents were purchased from commercial sources (Sigma Aldrich, Adamas, TCI and Acros) and used as supplied unless otherwise indicated. Solvents were distilled from sodium/benzophenone (toluene, tetrahydrofuran, Et<sub>2</sub>O, *n*-hexane) or calcium hydride (DCM, CHCl<sub>3</sub>) under argon prior to use. Chiral N<sup>^</sup>N-cyclometalated ligands **R/S-7 (Scheme S1)** were prepared via the serial reactions of Sonogashira,<sup>[1]</sup> Suzuki-Miyaura carbon–carbon coupling,<sup>[2]</sup> and the Sharpless copper-catalyzed Huisgen's 1,3-dipolar cycloaddition procedures.<sup>[3]</sup> All oxygen or moisture sensitive reactions were performed under argon atmosphere using standard Schlenk method. <sup>1</sup>H NMR and <sup>13</sup>C NMR spectra were detected on Bruker avance III 400/500 MHz spectrometer. Chemical shifts were recorded as parts per million (ppm,  $\delta$ ) relative to tetramethylsilane ( $\delta$  0.00) and CDCl<sub>3</sub> ( $\delta$  = 7.26, singlet). <sup>1</sup>H NMR splitting patterns are designated as singlet (s), doublet (d), triplet (t), multiplets (m) and etc. Mass spectrometry (MS) analyses were recorded on a Bruker Daltonics Ultrafle Xtreme MALDI-TOF MS, and  $\alpha$ -cyano-4-hydroxycinnamic acid ( $\alpha$ -CHCA) was used as supporting matrix in the MALDI-TOF MS measurement. Chiral high-performance liquid chromatography (HPLC) analyses were performed on Shimadzu SPD-20A using Daicel Chiralpak IA Column. Thermo-gravimetry analysis (TGA) was performed on a NETZSCH STA 449 F3 Jupiter instrument in an atmosphere of N<sub>2</sub> at a heating rate of 10 °C/min. The liquid crystalline textures were investigated and photographed using liquid crystal cells with a polarized optical microscope (POM) equipped with a Leitz-350 heating stage and an associated Nikon (D3100) digital camera. Differential scanning calorimetry (DSC) experiments were performed on a METTLER DSC 823e differential scanning calorimeter at a scan rate of 10 °C/min under the nitrogen atmosphere. Temperature-dependent, powder X-ray diffraction was measured on a small & wide angle X-Ray scattering system (SAXSess mc<sup>2</sup>, Cu-K $\alpha$ ,  $\lambda$  = 0.15418 nm). Ultraviolet–visible (UV–vis) absorption spectra were measured at room temperature on a Shimadzu UV-3600 spectrophotometer. The photoluminescence (PL) emission spectra were measured on an Edinburgh FLS 980 instrument or a HITACHI F-7000 fluorescence spectrophotometer at room temperature. Absolute quantum yield measured using the calibrated integrating sphere system at room temperature. The time-resolved measurements were taken on an Edinburgh FLS 980 instrument to measure the excited state lifetime. A diode laser with  $\lambda$  = 365 nm was used as the excitation source, and the time-correlated single photo count (TCSPC) method was used to collect photos. Scanning electron microscope (SEM) images were taken in Hitachi S-4800 field emission scanning electron microscopy.

**Thermal Annealing Treatments.** The thin film was prepared by dissolving the corresponding sample in chloroform (4 mg mL<sup>-1</sup>), followed by a spin coating (3000 rpm, 30 s) onto the quartz plate. The above quartz plates were put on the hot stage at 140 °C and the films were kept at this temperature for 30 min. Finally, the quartz plates

were moved to room temperature.

**Device Fabrication and Characterization.** The solution-processed multilayer OLEDs were fabricated as follows: Indium tin oxide (ITO)-coated glass substrates (1.5 cm × 1.5 cm) were cleaned with deionized water, and then sequentially ultrasonicated in dichloromethane (DCM), acetone and ethanol for 20 min, respectively. After finishing the preparatory work, the ITO substrates were treated in a UV-ozone oven for 20 min. Next, the 25 nm thickness PEDOT:PSS was spin-coated on the ITO substrates as the hole injection layer and dried at 120 °C for 30 min to remove the solvent. After that, the emitting layer (50 nm) was spin-coated onto the PEDOT:PSS coated substrates and dried at 140 °C for 30 min under N<sub>2</sub> atmosphere. Subsequently, 1,3,5-tris(N-phenylbenzimidazol-2-yl)-benzene (TPBi, 35 nm) was deposited by vacuum deposition as the electron transporting layer and hole blocking layer. Finally, Ca (10 nm) and Ag (100 nm) were sequentially deposited under 5×10<sup>-5</sup> Pa pressure as the electron injection layer and cathode, respectively. The current-voltage, device brightness and electroluminescence spectra characteristics of OLEDs were detected by using the Keithley 2636A and Photo Research PR-655 Spectra Scan.

**Electrochemical tests.** CV measurements were performed on a CHI660D (Shanghai CH Instrument Company, China). Cyclic voltammograms of **R/S-HPt** complexes were measured in degassed DCM solution (1.0×10<sup>-3</sup> mol/L) with 0.1 mol/L tetrabutylammonium hexafluorophosphate (Bu<sub>4</sub>NPF<sub>6</sub> was purified by recrystallization in EtOH before being used) as the supporting electrolyte with a scan rate of 100 mV/s. Potentials are reported vs the Fc/Fc<sup>+</sup> redox couple as an external reference. Counter electrode: Pt wire, working electrode: glassy carbon, and reference electrode: Ag/AgCl, with KCl (3 mol/L in deionized water) as a filling solution.

**Computational details.** Computational studies were carried out using Gaussian 16 program package.<sup>[4]</sup> For density functional theory (DFT) and time-dependent DFT (TDDFT) calculations, B3LYP<sup>[5]</sup> hybrid density function and 6-311g(d) basis was used for nonmetal atoms along with SMD solvent model (solvent: chloroform).<sup>[6]</sup> For platinum, a Stuttgart–Dresden (SDD) effective core potential was employed. S1 to S60 excited states were calculated based on the optimized structures in their ground state from DFT results, and the UV–vis spectrum was simulated using Multiwfn software.<sup>[7]</sup> The empirical dispersion correction D3 with Becke-Johnson damping (GD3BJ) was used for all calculations.<sup>[8-12]</sup>

**MD Stimulation Method.** All molecular dynamics simulations were carried out using Gromacs 2018.8 program<sup>[13]</sup> with general Amber ff99SB force field.<sup>[14]</sup> In this work, all molecules were optimized by Gaussian 16 program (DFT section).<sup>[4]</sup> Multiwfn was used to construct RESP charges.<sup>[7]</sup> 21 **S-HPt-C4** molecules were put into a cubic box with a side length of 5 nm using packmol software.<sup>[15]</sup> The cut-off for neighbor list of

Verlet method and that for short-range interactions is 1.2 nm in all calculations with periodic boundary conditions in all three directions. After the energy minimization, the systems were equilibrated in NPT ensemble. In this simulation, the system was simulated for 200 ps using Berendsen thermostat at 413.15 K with a coupling constant of 0.1 ps.<sup>[16]</sup> The time step of each simulation was taken as 2 fs. Then, all systems were finally run in NVT ensemble for 100 ns at 413.15 K. The time step of each simulation was 2 fs. Complexation energies were corrected for basis set superposition error (BSSE) using the counterpoise correction method.<sup>[17]</sup>

## 2. Synthetic procedures and characterization

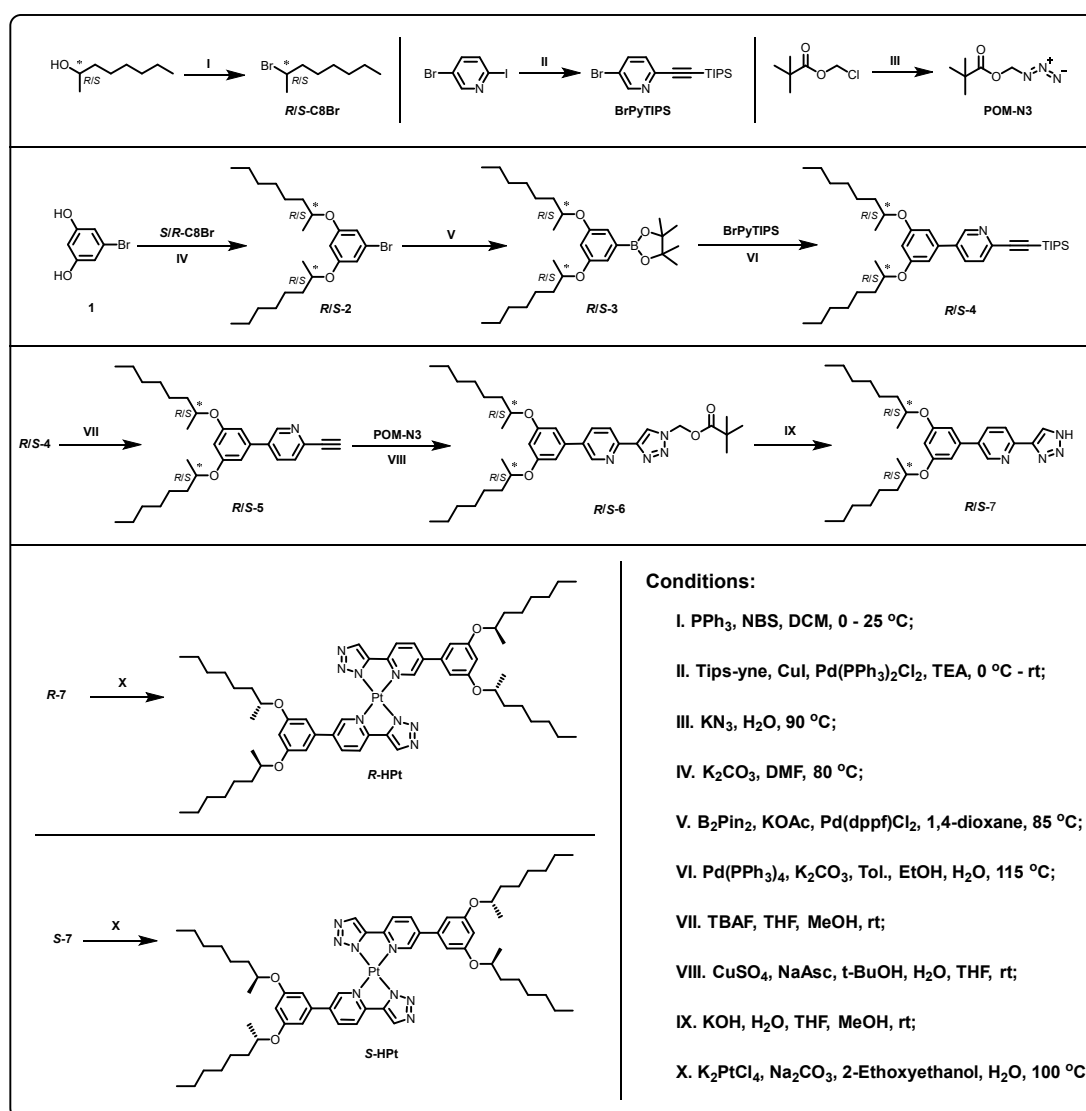

**Scheme S1.** Synthetic route of homoleptic Pt(II) complexes *R/S*-HPt.

### Synthesis of compound **S-C8Br**<sup>[18]</sup>

To a mixture of (*S*)-octan-2-ol (10.0 g, 76.79 mmol) and PPh<sub>3</sub> (30.21 g, 115.18 mmol) in dichloromethane (DCM, 60 mL), and N-Bromosuccinimide (NBS, 17.77 g, 99.82 mmol) was added slowly at 0 °C. Then protect it from light and stir it at room temperature for 24 h. Then, the solution was poured into water (50 mL) and extracted with DCM for three times (3 × 50 mL). The combined organic layers were dried over anhydrous Na<sub>2</sub>SO<sub>4</sub> and evaporated to remove solvent in vacuum. The residue was purified by chromatography on silica gel column eluting with PE to yield **S-C8Br** as a light brown yellow liquid (12.93 g, 87%). <sup>1</sup>H NMR (400 MHz, CDCl<sub>3</sub>) δ 4.19 – 4.08 (m, 1H), 1.88 – 1.72 (m, 2H), 1.71 (d, *J* = 6.6 Hz, 3H), 1.53 – 1.37 (m, 2H), 1.36 – 1.24 (m, 6H), 0.89 (t, *J* = 6.8 Hz, 3H).

### Synthesis of compound **BrPyTIPS**

To a mixture of 5-bromo-2-iodopyridine (4.72 g, 16.63 mmol), ethynyltriisopropylsilane (3.06 g, 16.79 mmol), Pd(PPh<sub>3</sub>)<sub>2</sub>Cl<sub>2</sub> (583.46 mg, 831.26 μmol) and CuI (158.31 mg, 831.26 μmol) in triethylamine (TEA, 45 mL) and acetonitrile (MeCN, 45 mL). Under the protection of argon, the mixture was stirred at RT overnight. Then the solvent was removed via evaporating and the residue dissolved in DCM (100 mL), then washed with water (3 × 50 mL), dried over anhydrous Na<sub>2</sub>SO<sub>4</sub> and filtrated. The filtrate was evaporated to remove the solvent and the residue was passed through a flash silica gel column using *n*-hexane as the eluent to give **BrPyTIPS** as a clear colorless oil (4.69 g, 83%). <sup>1</sup>H NMR (400 MHz, CDCl<sub>3</sub>) δ 8.64 (d, *J* = 1.9 Hz, 1H), 7.77 (dd, *J* = 8.3, 2.4 Hz, 1H), 7.35 (dd, *J* = 8.3, 0.4 Hz, 1H), 1.16 – 1.12 (m, 21H).

### Synthesis of compound **POM-N3**

To a solution of KN<sub>3</sub> (4.76 g, 58.72 mmol) in deionized water (100 mL) was added chloromethyl pivalate (8.04 g, 53.39 mmol). The mixture was stirred at 90 °C overnight under the inert gas atmosphere. The resultant mixture was extracted with ethyl acetate (EA, 100 mL) for three times. The final combined organic layer was dried with anhydrous Na<sub>2</sub>SO<sub>4</sub> and filtered. The solvent was removed by evaporating to get **POM-N3** as a colorless liquid (8.00 g, 95%). <sup>1</sup>H NMR (400 MHz, CDCl<sub>3</sub>) δ 5.14 (s, 2H), 1.25 (s, 9H). The NMR matched the reported previously.<sup>[19]</sup>

### Synthesis of compound **S-2**<sup>[20-23]</sup>

To a mixture of 5-bromobenzene-1,3-diol (5.75 g, 30.42 mmol), **S-C8Br** (12.93 g, 66.93 mmol) and potassium carbonate (16.82 g, 121.69 mmol) was added a degassed mixture of N, N-Dimethylformamide (DMF, 50 mL). The mixture was reacted at 80 °C

for 36 h under the protection of argon. After cooled to RT, the mixture was poured into water (100 mL) and extracted with DCM (3 × 50 mL). The combined organic layer was dried over anhydrous Na<sub>2</sub>SO<sub>4</sub> and filtered. The filtrate was evaporated to remove the solvent and the residue was passed through a flash silica gel column using PE/DCM (10:1) as the eluent to get **S-2** as a colorless oil (10.00 g, 79%). <sup>1</sup>H NMR (400 MHz, CDCl<sub>3</sub>) δ 6.60 (d, *J* = 2.2 Hz, 2H), 6.33 (s, 1H), 4.32 – 4.23 (m, 2H), 1.69 (ddd, *J* = 11.5, 9.5, 5.6 Hz, 2H), 1.53 (ddd, *J* = 13.5, 10.4, 5.1 Hz, 2H), 1.45 – 1.38 (m, 2H), 1.29 (dd, *J* = 14.2, 3.7 Hz, 20H), 0.88 (t, *J* = 6.8 Hz, 6H).

### Synthesis of compound **S-3**

A mixture of **S-2** (3.50 g, 8.47 mmol), bis(pinacolato)diboron (2.58 g, 10.16 mmol), potassium acetate (2.49 g, 25.40 mmol), [1,1'-bis(diphenylphosphino)-ferrocene] dichloropalladium complex with dichloromethane (1:1) (691.33 mg, 846.56 μmol), and 1,4-dioxane (60 mL) was stirred at 85 °C for 12 h under argon atmosphere. The resulting mixture was cooled to RT, poured into ice-water (100 mL) and then extracted with DCM (3 × 50 mL). The combined organic layers were washed with water and dried over anhydrous Na<sub>2</sub>SO<sub>4</sub> and filtrated. The filtrate was evaporated to remove the solvent and the residue was passed through a flash silica gel column using PE/EA (10:1) as the eluent to give **S-3** as a brown oil (3.41 g, 88%). <sup>1</sup>H NMR (400 MHz, CDCl<sub>3</sub>) δ 6.91 (d, *J* = 2.3 Hz, 2H), 6.53 (t, *J* = 2.3 Hz, 1H), 4.38 (dd, *J* = 12.1, 6.1 Hz, 2H), 1.71 (ddd, *J* = 13.2, 9.7, 6.6 Hz, 2H), 1.59 – 1.51 (m, 2H), 1.47 – 1.40 (m, 2H), 1.33 (s, 12H), 1.29 (dd, *J* = 10.7, 5.8 Hz, 20H), 0.88 (t, *J* = 6.8 Hz, 6H).

### Synthesis of compound **S-4**

To a mixture of **S-3** (3.41 g, 7.40 mmol), **BrPyTIPS** (2.76 g, 8.15 mmol), potassium carbonate (3.07 g, 22.21 mmol) and tetrakis(triphenylphosphine) palladium (Pd(PPh<sub>3</sub>)<sub>4</sub>, 855.70 mg, 740.49 μmol) was added a degassed mixture of toluene (40 mL), water (20 mL) and ethanol (20 mL). The mixture was refluxed (115 °C) for 24 h under the protection of argon. After cooled to RT, the mixture was poured into water (150 mL) and extracted with DCM (3 × 50 mL). The combined organic layer was dried over anhydrous Na<sub>2</sub>SO<sub>4</sub> and filtered. The filtrate was evaporated to remove the solvent and the residue was passed through a flash silica gel column using PE/EA (30:1) as the eluent to give **S-4** as a brown oil (4.30 g, 98%). <sup>1</sup>H NMR (400 MHz, CDCl<sub>3</sub>) δ 8.79 (d, *J* = 1.5 Hz, 1H), 7.85 (d, *J* = 7.8 Hz, 1H), 7.54 (d, *J* = 8.1 Hz, 1H), 6.63 (d, *J* = 2.0 Hz, 2H), 6.48 (d, *J* = 1.9 Hz, 1H), 4.43 – 4.33 (m, 2H), 1.79 – 1.70 (m, 2H), 1.58 (ddd, *J* = 13.6, 10.5, 5.1 Hz, 2H), 1.45 (dd, *J* = 11.5, 6.0 Hz, 2H), 1.39 – 1.25 (m, 20H), 1.22 – 1.10 (m, 21H), 0.88 (t, *J* = 6.9 Hz, 6H).

### Synthesis of compound **S-5**

To a solution of **S-4** (4.30 g, 7.26 mmol) and tetrabutylammonium fluoride (TBAF, 2.85 g, 10.90 mmol) in tetrahydrofuran (THF, 20 mL) and methanol (MeOH; 2 mL). The mixture was stirred at RT for 5 min under the air atmosphere. After reaction completion (detected by thin layer chromatography, TLC), the mixture was evaporated to remove the solvent and the residue was passed through a flash silica gel column using PE/EA (10:1) as the eluent to give **S-5** as a colorless oil (3.01 g, 95%). <sup>1</sup>H NMR (400 MHz, CDCl<sub>3</sub>) δ 8.80 (d, *J* = 1.7 Hz, 1H), 7.85 (dd, *J* = 8.1, 2.3 Hz, 1H), 7.54 (d, *J* = 8.1 Hz, 1H), 6.65 (d, *J* = 2.1 Hz, 2H), 6.48 (t, *J* = 2.1 Hz, 1H), 4.38 (dt, *J* = 12.1, 6.1 Hz, 2H), 3.24 (s, 1H), 1.80 – 1.71 (m, 2H), 1.58 (ddd, *J* = 13.6, 10.6, 5.1 Hz, 2H), 1.48 – 1.41 (m, 2H), 1.38 – 1.24 (m, 20H), 0.88 (t, *J* = 6.9 Hz, 6H).

### Synthesis of compound **S-6**

A solution of **S-5** (3.61 g, 8.29 mmol) and **POM-N3** (1.56 g, 9.94 mmol) in THF (30 mL), was added copper sulfate pentahydrate (206.89 mg, 828.64 μmol) and sodium ascorbate (541.72 mg, 2.73 mmol) in deionized water (10 mL) and tert-butanol (5 mL). The mixture was stirred overnight at RT in air. After reaction completion (detected by TLC), the mixture was extracted with EA (3 × 20 mL). The combined organic layer was washed with water (3 × 50 mL), and dried over anhydrous Na<sub>2</sub>SO<sub>4</sub> and filtrated. The filtrate was evaporated to remove the solvent and the residue was passed through a flash silica gel column using PE/EA (5:1) as the eluent to give **S-6** as a light brown oil (3.08 g, 63 %). <sup>1</sup>H NMR (400 MHz, CDCl<sub>3</sub>) δ 8.82 (s, 1H), 8.31 (s, 1H), 8.05 (s, 1H), 6.69 (d, *J* = 2.1 Hz, 2H), 6.49 (s, 1H), 6.33 (s, 2H), 4.40 (dd, *J* = 12.1, 6.1 Hz, 2H), 1.81 – 1.71 (m, 2H), 1.64 – 1.54 (m, 2H), 1.46 (dd, *J* = 11.6, 6.0 Hz, 2H), 1.42 – 1.26 (m, 21H), 1.21 (s, 9H), 0.88 (t, *J* = 6.8 Hz, 6H).

### Synthesis of compound **S-7**<sup>[3]</sup>

A solution of **S-6** (4.91 g, 8.28 mmol) in THF (30 mL), was added KOH (1.02 g, 18.22 mmol; 2 M in water) and MeOH (5 mL). The mixture was stirred at RT in air for 30 min, after reaction completion (detected by TLC), the mixture was extracted with EA (3 × 20 mL). The combined organic layer was washed with water (3 × 50 mL), and dried over anhydrous Na<sub>2</sub>SO<sub>4</sub> and filtrated. The filtrate was evaporated to remove the solvent to give crude product **S-7** as a colorless oil (2.54 g, 64%). This product was directly used to next step without further purification.

### Synthesis of chiral Pt(II) complex **S-HPt**<sup>[19]</sup>

To a mixture of **S-7** (500.00 mg, 1.04 mmol), K<sub>2</sub>PtCl<sub>4</sub> (197.08 mg, 474.79 μmol) and Na<sub>2</sub>CO<sub>3</sub> (251.61 mg, 2.37 mmol) in 2-Ethoxyethanol (10 mL) and water (3.5 mL), was stirred at 100 °C for 24 h. After the mixture was cooled to RT, it was extracted with DCM (3 × 10 mL). The combined organic layer was washed with water (3 × 20 mL), and dried over anhydrous Na<sub>2</sub>SO<sub>4</sub> and filtrated. The filtrate was evaporated to remove the solvent and the residue was passed through a flash silica gel column using DCM/EA (10:1) as the eluent to give **S-HPt** as an orange-red waxy solid (500 mg, 88%). <sup>1</sup>H NMR (500 MHz, CDCl<sub>3</sub>) δ 10.56 (s, 2H), 8.09 – 8.04 (m, 2H), 7.85 (s, 2H), 7.56 (dd, *J* = 8.1, 3.5 Hz, 2H), 6.82 (s, 4H), 6.54 (s, 2H), 4.52 (dd, *J* = 11.9, 5.9 Hz, 4H), 1.81 (ddd, *J* = 16.5, 10.8, 5.9 Hz, 4H), 1.66 (ddd, *J* = 13.7, 10.6, 5.3 Hz, 4H), 1.53 (dt, *J* = 17.2, 6.1 Hz, 4H), 1.44 (d, *J* = 6.0 Hz, 16H), 1.39 – 1.35 (m, 8H), 1.33 – 1.29 (m, 16H), 0.89 (t, *J* = 6.6 Hz, 12H). <sup>13</sup>C NMR (126 MHz, CDCl<sub>3</sub>) δ 160.20, 151.60, 150.07, 144.47, 137.39, 136.64, 136.08, 131.02, 119.02, 106.44, 104.43, 74.26, 36.65, 31.87, 29.39, 25.57, 22.66, 19.86, 14.13. MALDI-TOF MS *m/z* ( $\alpha$ -CHCA as matrix) calcd. for C<sub>58</sub>H<sub>83</sub>N<sub>8</sub>O<sub>4</sub>Pt<sup>+</sup> [M+H]<sup>+</sup>: *m/z* = 1150.619, found: *m/z* = 1150.083.

**Synthesis of chiral Pt(II) complex R-HPt.** The chiral Pt(II) complex **R-HPt** (yield = 93%) and its organic precursors were synthesized according to the same methods of complex **S-HPt**. <sup>1</sup>H NMR (500 MHz, CDCl<sub>3</sub>) δ 10.61 (s, 2H), 8.12 – 8.04 (m, 2H), 7.89 (s, 2H), 7.59 (d, *J* = 8.2 Hz, 2H), 6.83 (d, *J* = 1.2 Hz, 4H), 6.54 (t, *J* = 1.8 Hz, 2H), 4.53 (dt, *J* = 12.0, 5.9 Hz, 4H), 1.81 (dq, *J* = 13.4, 5.7 Hz, 4H), 1.71 – 1.61 (m, 4H), 1.56 – 1.49 (m, 4H), 1.43 (d, *J* = 6.0 Hz, 16H), 1.39 – 1.34 (m, 8H), 1.33 – 1.29 (m, 16H), 0.88 (t, *J* = 6.6 Hz, 12H). <sup>13</sup>C NMR (126 MHz, CDCl<sub>3</sub>) δ 160.19, 151.59, 150.08, 144.45, 137.36, 136.65, 136.02, 131.05, 119.01, 106.45, 104.39, 74.26, 36.65, 31.87, 29.39, 25.58, 22.66, 19.86, 14.13. MALDI-TOF MS *m/z* ( $\alpha$ -CHCA as matrix) calcd. for C<sub>58</sub>H<sub>83</sub>N<sub>8</sub>O<sub>4</sub>Pt<sup>+</sup> [M+H]<sup>+</sup>: *m/z* = 1150.619, found: *m/z* = 1150.059.



### 3. UV-*vis* absorption and PL spectra of *S*-HPT and UV-*vis* absorption spectra of ligands *R/S*-7

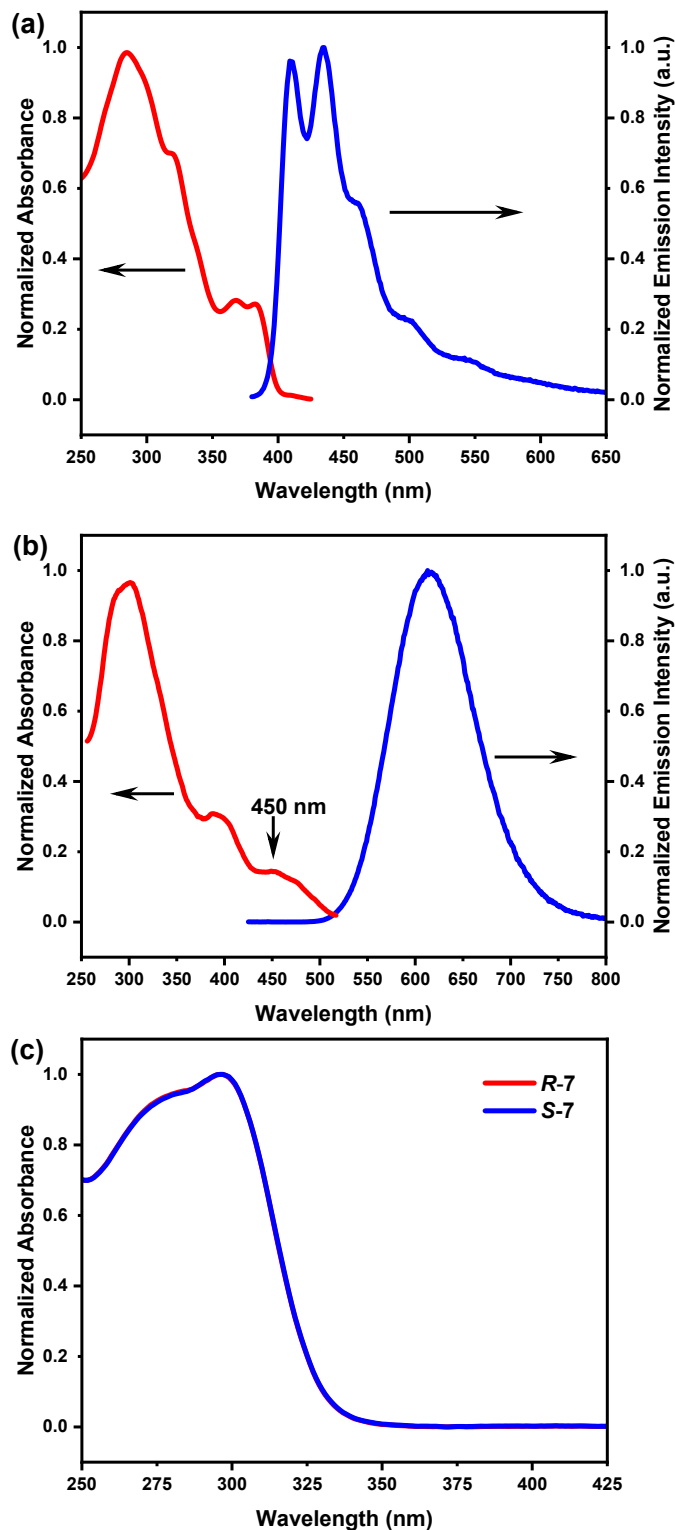

**Fig. S1** UV-*vis* absorption and PL spectra of *S*-HPT in chloroform ( $1.0 \times 10^{-5} \text{ mol L}^{-1}$ ) (a) and spin-coated films (b); UV-*vis* absorption spectra of ligands *R/S*-7 in chloroform ( $1.0 \times 10^{-5} \text{ mol L}^{-1}$ ) (c).

#### 4. Computational investigations

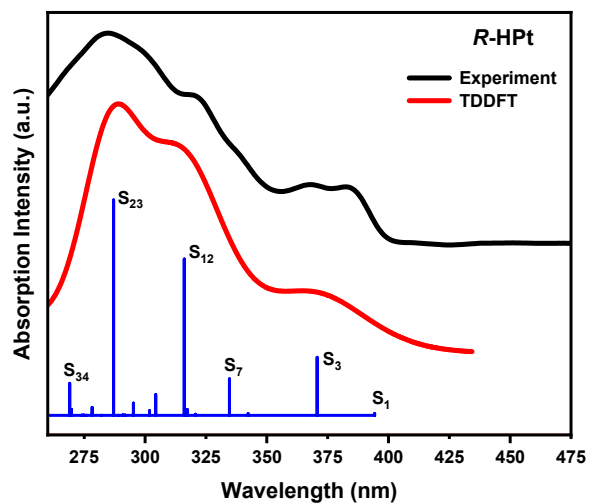

**Fig. S2** TDDFT-predictated vertical excitations of *R*-HPt. The absorption spectrum is shown for comparison.

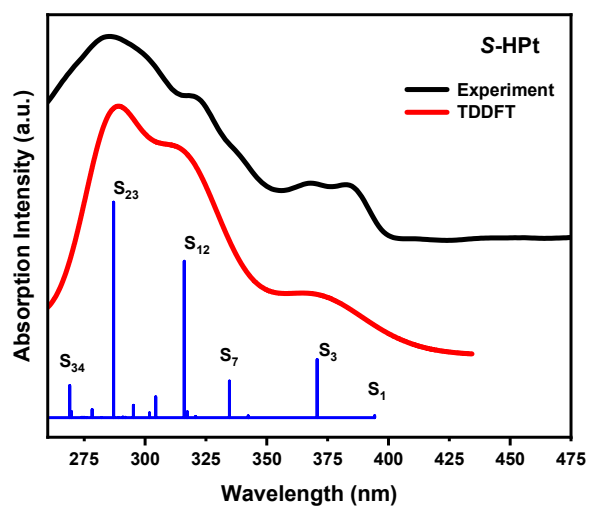

**Fig. S3** TDDFT-predictated vertical excitations of *S*-HPt. The absorption spectrum is shown for comparison.

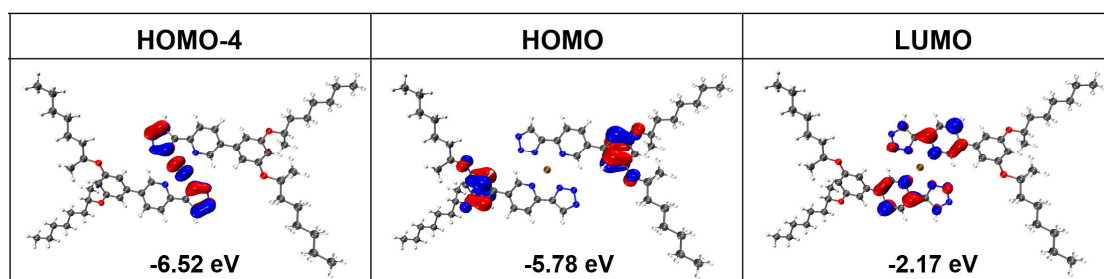

**Fig. S4** Frontier molecular orbitals and energy level of *S*-HPt.

**Table S1** Computed excitation energies and oscillator strengths for the  $S_1 \rightarrow S_{60}$  transitions of homoleptic Pt(II) complexes **R-HPt**.

| $S_n$    | $E$ (eV) | $\lambda$ (nm) | $f$    | transitions                                                                                                                                                              |
|----------|----------|----------------|--------|--------------------------------------------------------------------------------------------------------------------------------------------------------------------------|
| $S_1$    | 3.1444   | 394.3          | 0.0095 | H $\rightarrow$ L 93.9%, H-1 $\rightarrow$ L+1 5.1%                                                                                                                      |
| $S_2$    | 3.1445   | 394.29         | 0.0029 | H-1 $\rightarrow$ L 93.9%, H $\rightarrow$ L+1 5.2%                                                                                                                      |
| $S_3$    | 3.3445   | 370.71         | 0.2889 | H-2 $\rightarrow$ L 78.8%, H-4 $\rightarrow$ L 18.2%                                                                                                                     |
| $S_4$    | 3.4683   | 357.48         | 0      | H-3 $\rightarrow$ L 96.0%                                                                                                                                                |
| $S_5$    | 3.6214   | 342.37         | 0.0054 | H $\rightarrow$ L+1 93.4%, H-1 $\rightarrow$ L 5.1%                                                                                                                      |
| $S_6$    | 3.6216   | 342.35         | 0.0089 | H-1 $\rightarrow$ L+1 93.0%, H $\rightarrow$ L 5.1%                                                                                                                      |
| $S_7$    | 3.705    | 334.64         | 0.1819 | H-4 $\rightarrow$ L 78.1%, H-2 $\rightarrow$ L 18.8%                                                                                                                     |
| $S_8$    | 3.8271   | 323.96         | 0      | H-2 $\rightarrow$ L+1 83.5%, H-4 $\rightarrow$ L+1 9.8%                                                                                                                  |
| $S_9$    | 3.8657   | 320.73         | 0.006  | H-7 $\rightarrow$ L 98.5%                                                                                                                                                |
| $S_{10}$ | 3.9066   | 317.37         | 0.029  | H $\rightarrow$ L+2 55.2%, H-1 $\rightarrow$ L+3 33.0%, H-3 $\rightarrow$ L+1 8.0%                                                                                       |
| $S_{11}$ | 3.909    | 317.18         | 0.0086 | H-1 $\rightarrow$ L+2 60.6%, H $\rightarrow$ L+3 36.0%                                                                                                                   |
| $S_{12}$ | 3.9226   | 316.08         | 0.777  | H-3 $\rightarrow$ L+1 80.6%, H $\rightarrow$ L+2 5.8%, H-5 $\rightarrow$ L 5.6%                                                                                          |
| $S_{13}$ | 4.0737   | 304.35         | 0.1031 | H-5 $\rightarrow$ L 64.3%, H-8 $\rightarrow$ L 22.8%, H-3 $\rightarrow$ L+1 7.4%                                                                                         |
| $S_{14}$ | 4.0952   | 302.75         | 0.0001 | H-4 $\rightarrow$ L+1 49.7%, H-6 $\rightarrow$ L 33.6%, H-2 $\rightarrow$ L+1 8.3%                                                                                       |
| $S_{15}$ | 4.1079   | 301.82         | 0.024  | H-4 $\rightarrow$ L+4 53.0%, H-2 $\rightarrow$ L+4 26.9%, H-2 $\rightarrow$ L+2 7.7%                                                                                     |
| $S_{16}$ | 4.1579   | 298.19         | 0.0001 | H-6 $\rightarrow$ L 55.4%, H-4 $\rightarrow$ L+1 34.0%                                                                                                                   |
| $S_{17}$ | 4.2003   | 295.18         | 0.061  | H-2 $\rightarrow$ L+2 38.8%, H-8 $\rightarrow$ L 25.6%, H-3 $\rightarrow$ L+3 12.2%, H-5 $\rightarrow$ L 10.4%                                                           |
| $S_{18}$ | 4.2484   | 291.84         | 0      | H $\rightarrow$ L+3 62.2%, H-1 $\rightarrow$ L+2 37.0%                                                                                                                   |
| $S_{19}$ | 4.2485   | 291.83         | 0.0016 | H-1 $\rightarrow$ L+3 62.0%, H $\rightarrow$ L+2 36.7%                                                                                                                   |
| $S_{20}$ | 4.2626   | 290.87         | 0.0032 | H-7 $\rightarrow$ L+1 92.8%                                                                                                                                              |
| $S_{21}$ | 4.271    | 290.29         | 0.0002 | H-7 $\rightarrow$ L+4 38.5%, H-3 $\rightarrow$ L+2 25.2%, H-2 $\rightarrow$ L+3 21.5%, H-8 $\rightarrow$ L+1 7.7%                                                        |
| $S_{22}$ | 4.29     | 289.01         | 0.0003 | H-7 $\rightarrow$ L+4 45.9%, H-2 $\rightarrow$ L+3 21.3%, H-3 $\rightarrow$ L+2 18.7%, H-6 $\rightarrow$ L 5.7%                                                          |
| $S_{23}$ | 4.319    | 287.07         | 1.0709 | H-8 $\rightarrow$ L 44.7%, H-2 $\rightarrow$ L+2 31.0%, H-5 $\rightarrow$ L 13.8%                                                                                        |
| $S_{24}$ | 4.3943   | 282.15         | 0.0004 | H-9 $\rightarrow$ L 93.9%                                                                                                                                                |
| $S_{25}$ | 4.4255   | 280.16         | 0      | H-3 $\rightarrow$ L+2 46.7%, H-2 $\rightarrow$ L+3 42.1%, H-4 $\rightarrow$ L+3 5.6%                                                                                     |
| $S_{26}$ | 4.4562   | 278.23         | 0.04   | H-3 $\rightarrow$ L+3 71.0%, H-2 $\rightarrow$ L+2 13.6%, H-4 $\rightarrow$ L+2 9.8%                                                                                     |
| $S_{27}$ | 4.4915   | 276.04         | 0.0008 | H-10 $\rightarrow$ L 53.3%, H-2 $\rightarrow$ L+4 14.2%, H-8 $\rightarrow$ L+4 7.5%, H-4 $\rightarrow$ L+4 6.7%, H-4 $\rightarrow$ L+2 5.7%                              |
| $S_{28}$ | 4.51     | 274.91         | 0.002  | H-10 $\rightarrow$ L 35.2%, H-2 $\rightarrow$ L+4 16.5%, H-8 $\rightarrow$ L+4 12.6%, H-4 $\rightarrow$ L+4 9.8%, H-4 $\rightarrow$ L+2 9.7%, H-5 $\rightarrow$ L+4 6.2% |
| $S_{29}$ | 4.5226   | 274.14         | 0.0001 | H-1 $\rightarrow$ L+4 96.4%                                                                                                                                              |
| $S_{30}$ | 4.524    | 274.06         | 0.0018 | H $\rightarrow$ L+4 96.4%                                                                                                                                                |
| $S_{31}$ | 4.5688   | 271.37         | 0      | H-5 $\rightarrow$ L+1 89.6%                                                                                                                                              |
| $S_{32}$ | 4.5922   | 269.99         | 0      | H-3 $\rightarrow$ L+4 81.8%, H-4 $\rightarrow$ L+3 6.5%, H-6 $\rightarrow$ L+4 5.7%                                                                                      |
| $S_{33}$ | 4.5963   | 269.75         | 0.0296 | H-6 $\rightarrow$ L+1 41.4%, H-4 $\rightarrow$ L+2 36.0%, H-3 $\rightarrow$ L+3 7.4%, H-4 $\rightarrow$ L+4 5.4%                                                         |
| $S_{34}$ | 4.6089   | 269.01         | 0.1591 | H-6 $\rightarrow$ L+1 50.7%, H-4 $\rightarrow$ L+2 32.9%                                                                                                                 |
| $S_{35}$ | 4.6331   | 267.61         | 0      | H-4 $\rightarrow$ L+3 82.5%, H-3 $\rightarrow$ L+4 5.1%                                                                                                                  |
| $S_{36}$ | 4.7591   | 260.52         | 0.0002 | H-8 $\rightarrow$ L+1 72.8%, H-2 $\rightarrow$ L+3 6.3%                                                                                                                  |

|                 |        |        |        |                                                                              |
|-----------------|--------|--------|--------|------------------------------------------------------------------------------|
| S <sub>37</sub> | 4.8006 | 258.27 | 0.0031 | H-8 → L+4 51.5%, H-2 → L+4 28.5%                                             |
| S <sub>38</sub> | 4.8275 | 256.83 | 0      | H-7 → L+2 94.0%                                                              |
| S <sub>39</sub> | 4.8659 | 254.8  | 0.0006 | H-7 → L+3 90.9%                                                              |
| S <sub>40</sub> | 4.9058 | 252.73 | 0.0121 | H-9 → L+1 76.8%, H-10 → L 7.6%, H-5 → L+2 7.2%                               |
| S <sub>41</sub> | 4.9163 | 252.19 | 0.0835 | H-5 → L+2 56.7%, H-6 → L+3 22.5%, H-9 → L+1 9.1%                             |
| S <sub>42</sub> | 4.9294 | 251.52 | 0.0001 | H-6 → L+2 45.8%, H-5 → L+3 24.1%, H-11 → L 18.0%                             |
| S <sub>43</sub> | 4.9982 | 248.06 | 0      | H-10 → L+1 91.1%                                                             |
| S <sub>44</sub> | 5.0213 | 246.92 | 0.0038 | H-11 → L 55.1%, H-1 → L+5 11.3%, H-13 → L 7.0%, H-5 → L+3 6.8%, H → L+6 5.8% |
| S <sub>45</sub> | 5.0441 | 245.8  | 0.0349 | H → L+5 48.8%, H-1 → L+6 25.1%, H-3 → L+8 7.3%                               |
| S <sub>46</sub> | 5.0503 | 245.5  | 0.0141 | H-1 → L+5 37.7%, H → L+6 19.4%, H-11 → L 11.4%, H-2 → L+8 6.0%               |
| S <sub>47</sub> | 5.1308 | 241.65 | 0.0343 | H-8 → L+2 28.8%, H-6 → L+3 27.9%, H-12 → L 23.2%, H-5 → L+2 11.1%            |
| S <sub>48</sub> | 5.1403 | 241.2  | 0.0001 | H-5 → L+3 51.8%, H-6 → L+2 35.6%                                             |
| S <sub>49</sub> | 5.1758 | 239.55 | 0.0261 | H-6 → L+3 41.5%, H-12 → L 22.3%, H-8 → L+2 15.9%, H-5 → L+2 14.1%            |
| S <sub>50</sub> | 5.1778 | 239.45 | 0      | H-19 → L+4 44.6%, H-9 → L+4 43.6%, H-9 → L+2 5.1%                            |
| S <sub>51</sub> | 5.2476 | 236.27 | 0.1195 | H-12 → L 45.5%, H-8 → L+2 42.8%                                              |
| S <sub>52</sub> | 5.2824 | 234.71 | 0      | H-8 → L+3 48.4%, H-13 → L 36.0%                                              |
| S <sub>53</sub> | 5.3219 | 232.97 | 0      | H-13 → L 42.5%, H-8 → L+3 37.0%, H-11 → L 7.3%                               |
| S <sub>54</sub> | 5.3556 | 231.5  | 0.0017 | H-16 → L 90.6%                                                               |
| S <sub>55</sub> | 5.3828 | 230.33 | 0      | H-6 → L+4 58.2%, H-9 → L+2 25.8%, H-19 → L 6.3%                              |
| S <sub>56</sub> | 5.3839 | 230.29 | 0.0022 | H-5 → L+4 78.9%, H-8 → L+4 7.5%                                              |
| S <sub>57</sub> | 5.392  | 229.94 | 0      | H-9 → L+2 49.2%, H-6 → L+4 30.1%, H-19 → L 9.4%                              |
| S <sub>58</sub> | 5.4221 | 228.66 | 0.0002 | H-19 → L 77.6%, H-9 → L+2 16.2%                                              |
| S <sub>59</sub> | 5.4442 | 227.74 | 0.0626 | H-11 → L+1 53.7%, H-2 → L+5 12.6%, H → L+5 6.7%, H → L+7 5.5%                |
| S <sub>60</sub> | 5.4549 | 227.29 | 0.0009 | H-11 → L+1 30.5%, H → L+5 20.6%, H-1 → L+6 16.4%, H-2 → L+5 12.7%            |

**Table S2** Computed excitation energies and oscillator strengths for the  $S_1 \rightarrow S_{60}$  transitions of homoleptic Pt(II) complexes **S-HPt**.

| $S_n$    | $E$ (eV) | $\lambda$ (nm) | $f$    | transitions                                                                                                                                                              |
|----------|----------|----------------|--------|--------------------------------------------------------------------------------------------------------------------------------------------------------------------------|
| $S_1$    | 3.1444   | 394.3          | 0.0095 | H $\rightarrow$ L 93.9%, H-1 $\rightarrow$ L+1 5.1%                                                                                                                      |
| $S_2$    | 3.1445   | 394.29         | 0.0029 | H-1 $\rightarrow$ L 93.9%, H $\rightarrow$ L+1 5.2%                                                                                                                      |
| $S_3$    | 3.3445   | 370.71         | 0.2889 | H-2 $\rightarrow$ L 78.8%, H-4 $\rightarrow$ L 18.2%                                                                                                                     |
| $S_4$    | 3.4683   | 357.48         | 0      | H-3 $\rightarrow$ L 96.0%                                                                                                                                                |
| $S_5$    | 3.6214   | 342.37         | 0.0054 | H $\rightarrow$ L+1 93.3%, H-1 $\rightarrow$ L 5.1%                                                                                                                      |
| $S_6$    | 3.6216   | 342.35         | 0.0089 | H-1 $\rightarrow$ L+1 93.0%, H $\rightarrow$ L 5.1%                                                                                                                      |
| $S_7$    | 3.705    | 334.64         | 0.1819 | H-4 $\rightarrow$ L 78.1%, H-2 $\rightarrow$ L 18.8%                                                                                                                     |
| $S_8$    | 3.8271   | 323.96         | 0      | H-2 $\rightarrow$ L+1 83.5%, H-4 $\rightarrow$ L+1 9.8%                                                                                                                  |
| $S_9$    | 3.8657   | 320.73         | 0.006  | H-7 $\rightarrow$ L 98.5%                                                                                                                                                |
| $S_{10}$ | 3.9066   | 317.37         | 0.0291 | H $\rightarrow$ L+2 55.2%, H-1 $\rightarrow$ L+3 32.9%, H-3 $\rightarrow$ L+1 8.0%                                                                                       |
| $S_{11}$ | 3.909    | 317.18         | 0.0086 | H-1 $\rightarrow$ L+2 60.6%, H $\rightarrow$ L+3 36.0%                                                                                                                   |
| $S_{12}$ | 3.9225   | 316.08         | 0.777  | H-3 $\rightarrow$ L+1 80.6%, H $\rightarrow$ L+2 5.9%, H-5 $\rightarrow$ L 5.6%                                                                                          |
| $S_{13}$ | 4.0737   | 304.35         | 0.1031 | H-5 $\rightarrow$ L 64.3%, H-8 $\rightarrow$ L 22.8%, H-3 $\rightarrow$ L+1 7.4%                                                                                         |
| $S_{14}$ | 4.0952   | 302.75         | 0.0001 | H-4 $\rightarrow$ L+1 49.8%, H-6 $\rightarrow$ L 33.6%, H-2 $\rightarrow$ L+1 8.3%                                                                                       |
| $S_{15}$ | 4.1079   | 301.82         | 0.024  | H-4 $\rightarrow$ L+4 53.0%, H-2 $\rightarrow$ L+4 26.9%, H-2 $\rightarrow$ L+2 7.7%                                                                                     |
| $S_{16}$ | 4.1579   | 298.19         | 0.0001 | H-6 $\rightarrow$ L 55.4%, H-4 $\rightarrow$ L+1 33.9%                                                                                                                   |
| $S_{17}$ | 4.2003   | 295.18         | 0.0611 | H-2 $\rightarrow$ L+2 38.8%, H-8 $\rightarrow$ L 25.6%, H-3 $\rightarrow$ L+3 12.2%, H-5 $\rightarrow$ L 10.4%                                                           |
| $S_{18}$ | 4.2484   | 291.84         | 0      | H $\rightarrow$ L+3 62.2%, H-1 $\rightarrow$ L+2 36.9%                                                                                                                   |
| $S_{19}$ | 4.2485   | 291.83         | 0.0016 | H-1 $\rightarrow$ L+3 62.0%, H $\rightarrow$ L+2 36.7%                                                                                                                   |
| $S_{20}$ | 4.2625   | 290.87         | 0.0032 | H-7 $\rightarrow$ L+1 92.8%                                                                                                                                              |
| $S_{21}$ | 4.271    | 290.29         | 0.0002 | H-7 $\rightarrow$ L+4 38.5%, H-3 $\rightarrow$ L+2 25.3%, H-2 $\rightarrow$ L+3 21.5%, H-8 $\rightarrow$ L+1 7.7%                                                        |
| $S_{22}$ | 4.2899   | 289.01         | 0.0003 | H-7 $\rightarrow$ L+4 45.9%, H-2 $\rightarrow$ L+3 21.3%, H-3 $\rightarrow$ L+2 18.7%, H-6 $\rightarrow$ L 5.7%                                                          |
| $S_{23}$ | 4.319    | 287.07         | 1.0708 | H-8 $\rightarrow$ L 44.7%, H-2 $\rightarrow$ L+2 31.0%, H-5 $\rightarrow$ L 13.8%                                                                                        |
| $S_{24}$ | 4.3942   | 282.15         | 0.0004 | H-9 $\rightarrow$ L 93.9%                                                                                                                                                |
| $S_{25}$ | 4.4255   | 280.16         | 0      | H-3 $\rightarrow$ L+2 46.7%, H-2 $\rightarrow$ L+3 42.1%, H-4 $\rightarrow$ L+3 5.6%                                                                                     |
| $S_{26}$ | 4.4562   | 278.23         | 0.04   | H-3 $\rightarrow$ L+3 71.0%, H-2 $\rightarrow$ L+2 13.6%, H-4 $\rightarrow$ L+2 9.8%                                                                                     |
| $S_{27}$ | 4.4915   | 276.04         | 0.0008 | H-10 $\rightarrow$ L 53.4%, H-2 $\rightarrow$ L+4 14.2%, H-8 $\rightarrow$ L+4 7.5%, H-4 $\rightarrow$ L+4 6.7%, H-4 $\rightarrow$ L+2 5.7%                              |
| $S_{28}$ | 4.51     | 274.91         | 0.002  | H-10 $\rightarrow$ L 35.2%, H-2 $\rightarrow$ L+4 16.5%, H-8 $\rightarrow$ L+4 12.6%, H-4 $\rightarrow$ L+4 9.8%, H-4 $\rightarrow$ L+2 9.7%, H-5 $\rightarrow$ L+4 6.2% |
| $S_{29}$ | 4.5226   | 274.14         | 0.0001 | H-1 $\rightarrow$ L+4 96.3%                                                                                                                                              |
| $S_{30}$ | 4.524    | 274.06         | 0.0018 | H $\rightarrow$ L+4 96.4%                                                                                                                                                |
| $S_{31}$ | 4.5688   | 271.37         | 0      | H-5 $\rightarrow$ L+1 89.6%                                                                                                                                              |
| $S_{32}$ | 4.5922   | 269.99         | 0      | H-3 $\rightarrow$ L+4 81.8%, H-4 $\rightarrow$ L+3 6.5%, H-6 $\rightarrow$ L+4 5.7%                                                                                      |
| $S_{33}$ | 4.5963   | 269.75         | 0.0295 | H-6 $\rightarrow$ L+1 41.3%, H-4 $\rightarrow$ L+2 36.0%, H-3 $\rightarrow$ L+3 7.4%, H-4 $\rightarrow$ L+4 5.4%                                                         |
| $S_{34}$ | 4.6089   | 269.01         | 0.1592 | H-6 $\rightarrow$ L+1 50.7%, H-4 $\rightarrow$ L+2 32.8%                                                                                                                 |
| $S_{35}$ | 4.6331   | 267.61         | 0      | H-4 $\rightarrow$ L+3 82.5%, H-3 $\rightarrow$ L+4 5.1%                                                                                                                  |
| $S_{36}$ | 4.759    | 260.53         | 0.0002 | H-8 $\rightarrow$ L+1 72.8%, H-2 $\rightarrow$ L+3 6.3%                                                                                                                  |

|                 |        |        |        |                                                                              |
|-----------------|--------|--------|--------|------------------------------------------------------------------------------|
| S <sub>37</sub> | 4.8006 | 258.27 | 0.0031 | H-8 → L+4 51.5%, H-2 → L+4 28.5%                                             |
| S <sub>38</sub> | 4.8275 | 256.83 | 0      | H-7 → L+2 94.0%                                                              |
| S <sub>39</sub> | 4.8659 | 254.8  | 0.0006 | H-7 → L+3 90.9%                                                              |
| S <sub>40</sub> | 4.9058 | 252.73 | 0.0121 | H-9 → L+1 76.8%, H-10 → L 7.6%, H-5 → L+2 7.2%                               |
| S <sub>41</sub> | 4.9163 | 252.19 | 0.0835 | H-5 → L+2 56.7%, H-6 → L+3 22.5%, H-9 → L+1 9.1%                             |
| S <sub>42</sub> | 4.9294 | 251.52 | 0.0001 | H-6 → L+2 45.8%, H-5 → L+3 24.1%, H-11 → L 18.0%                             |
| S <sub>43</sub> | 4.9982 | 248.06 | 0      | H-10 → L+1 91.1%                                                             |
| S <sub>44</sub> | 5.0213 | 246.92 | 0.0038 | H-11 → L 55.1%, H-1 → L+5 11.3%, H-13 → L 7.0%, H-5 → L+3 6.8%, H → L+6 5.8% |
| S <sub>45</sub> | 5.0441 | 245.8  | 0.0349 | H → L+5 48.8%, H-1 → L+6 25.1%, H-3 → L+8 7.3%                               |
| S <sub>46</sub> | 5.0503 | 245.5  | 0.0141 | H-1 → L+5 37.7%, H → L+6 19.4%, H-11 → L 11.4%, H-2 → L+8 6.0%               |
| S <sub>47</sub> | 5.1308 | 241.65 | 0.0343 | H-8 → L+2 28.8%, H-6 → L+3 27.9%, H-12 → L 23.2%, H-5 → L+2 11.1%            |
| S <sub>48</sub> | 5.1403 | 241.2  | 0.0001 | H-5 → L+3 51.8%, H-6 → L+2 35.6%                                             |
| S <sub>49</sub> | 5.1758 | 239.55 | 0.0262 | H-6 → L+3 41.5%, H-12 → L 22.3%, H-8 → L+2 15.9%, H-5 → L+2 14.1%            |
| S <sub>50</sub> | 5.1778 | 239.45 | 0      | H-19 → L+4 44.6%, H-9 → L+4 43.6%, H-9 → L+2 5.1%                            |
| S <sub>51</sub> | 5.2476 | 236.27 | 0.1195 | H-12 → L 45.5%, H-8 → L+2 42.8%                                              |
| S <sub>52</sub> | 5.2824 | 234.71 | 0      | H-8 → L+3 48.4%, H-13 → L 36.0%                                              |
| S <sub>53</sub> | 5.3219 | 232.97 | 0      | H-13 → L 42.5%, H-8 → L+3 37.0%, H-11 → L 7.3%                               |
| S <sub>54</sub> | 5.3556 | 231.5  | 0.0017 | H-16 → L 90.6%                                                               |
| S <sub>55</sub> | 5.3828 | 230.33 | 0      | H-6 → L+4 58.1%, H-9 → L+2 26.0%, H-19 → L 6.3%                              |
| S <sub>56</sub> | 5.3839 | 230.29 | 0.0022 | H-5 → L+4 78.9%, H-8 → L+4 7.5%                                              |
| S <sub>57</sub> | 5.392  | 229.94 | 0      | H-9 → L+2 49.1%, H-6 → L+4 30.3%, H-19 → L 9.3%                              |
| S <sub>58</sub> | 5.4221 | 228.66 | 0.0002 | H-19 → L 77.6%, H-9 → L+2 16.1%                                              |
| S <sub>59</sub> | 5.4442 | 227.74 | 0.0626 | H-11 → L+1 53.7%, H-2 → L+5 12.5%, H → L+5 6.7%, H → L+7 5.5%                |
| S <sub>60</sub> | 5.4548 | 227.29 | 0.0009 | H-11 → L+1 30.4%, H → L+5 20.6%, H-1 → L+6 16.4%, H-2 → L+5 12.7%            |

## 5. Photophysical properties

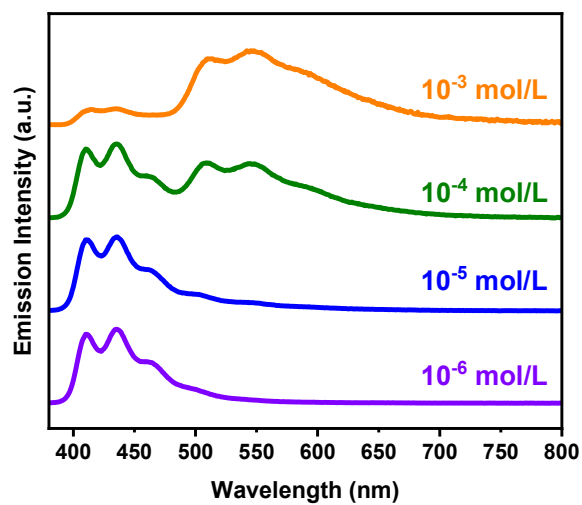

**Fig. S5** PL spectra of **S-HPt** in chloroform.

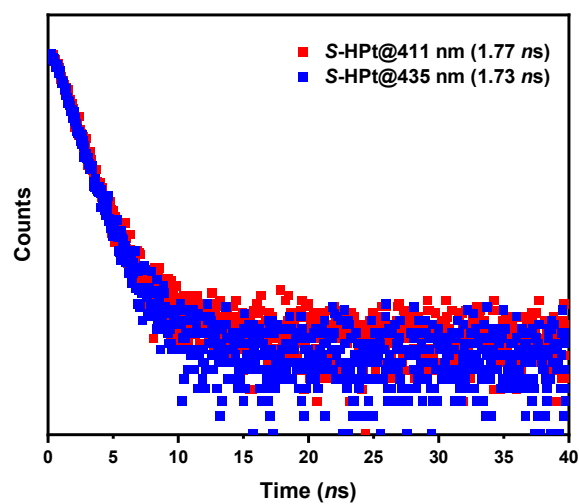

**Fig. S6** Transient PL decay of **S-HPt** in chloroform ( $1.0 \times 10^{-6}$  mol L<sup>-1</sup>).

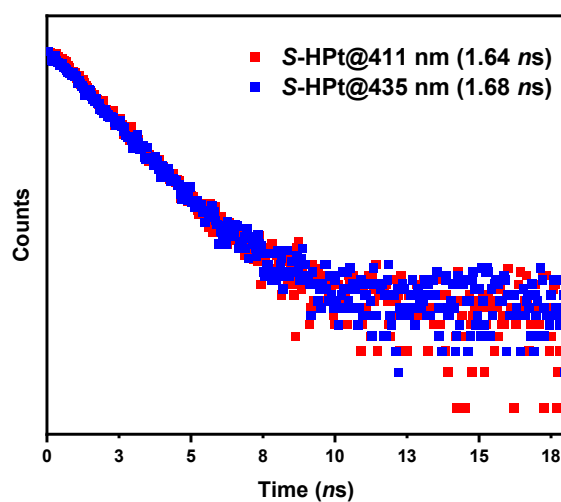

**Fig. S7** Transient PL decay of **S-HPt** in chloroform ( $1.0 \times 10^{-5}$  mol L<sup>-1</sup>).

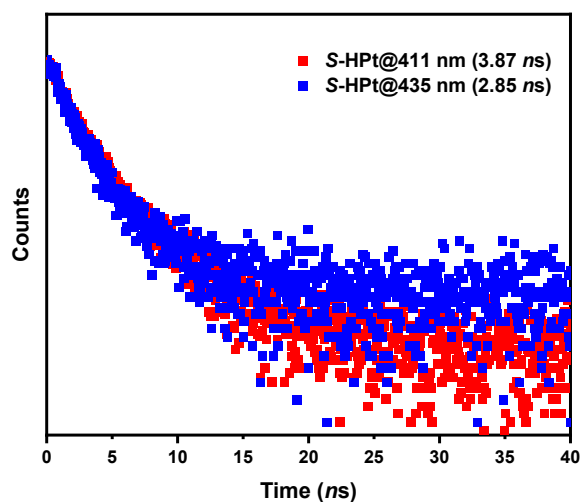

**Fig. S8** Transient PL decay of *S*-HPt @411 nm and 435 nm in chloroform ( $1.0 \times 10^{-4}$  mol L<sup>-1</sup>).

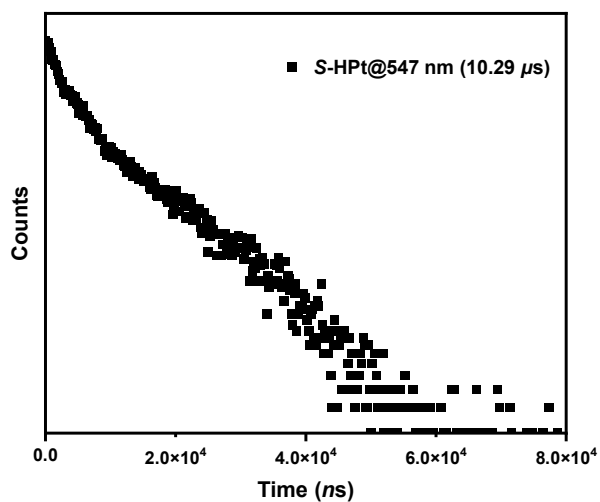

**Fig. S9** Transient PL decay of *S*-HPt in chloroform ( $1.0 \times 10^{-3}$  mol L<sup>-1</sup>).

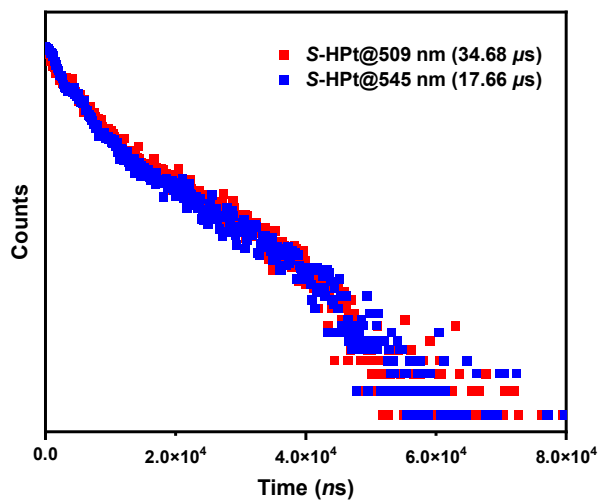

**Fig. S10** Transient PL decay of *S*-HPt @ 509 nm and 545 nm in chloroform ( $1.0 \times 10^{-4}$  mol L<sup>-1</sup>).



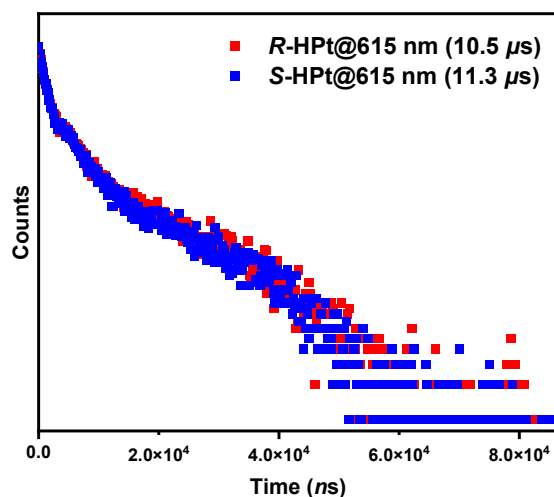

**Fig. S11** Transient PL decay of spin-coated films *R/S*-HPt.

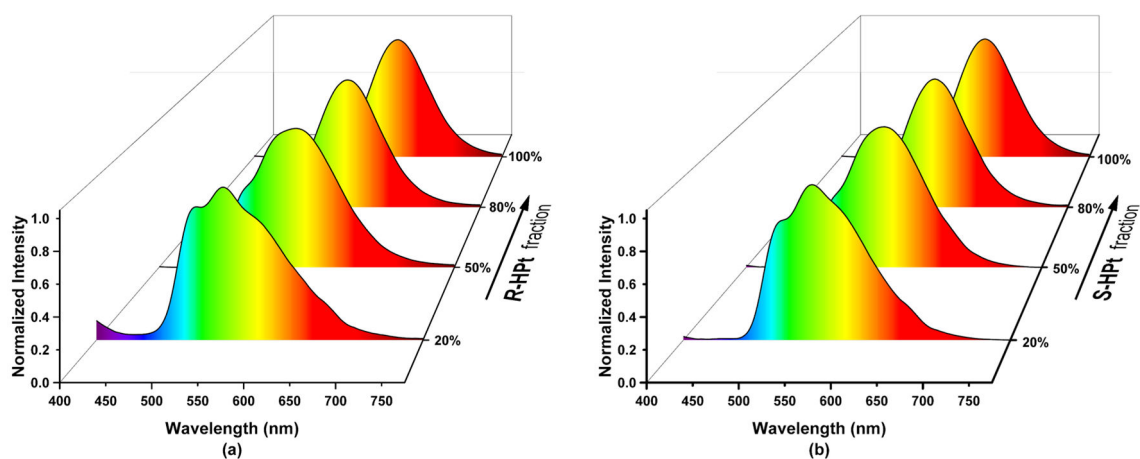

**Fig. S12** PL emission spectra of *R/S*-HPt doped in OXD-7.

## 6. Thermal properties of *R/S*-HPt

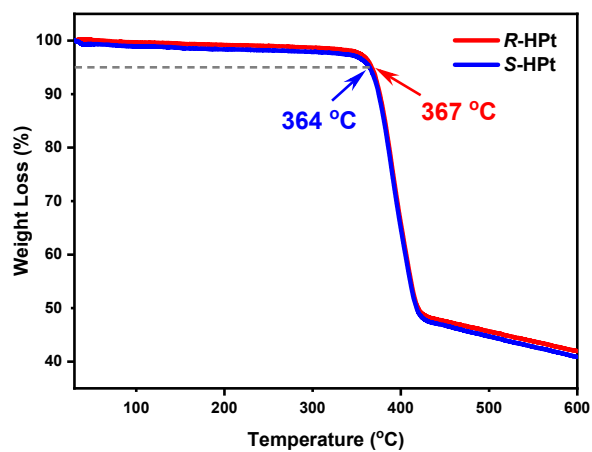

**Fig. S13** TGA curves of *R/S*-HPt under the protection of nitrogen.

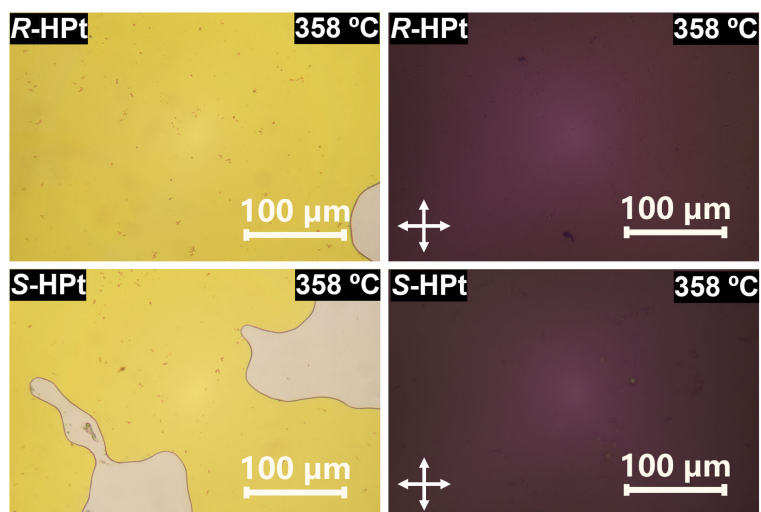

Fig. S14 POM images of *R/S*-HPt at 358 °C.

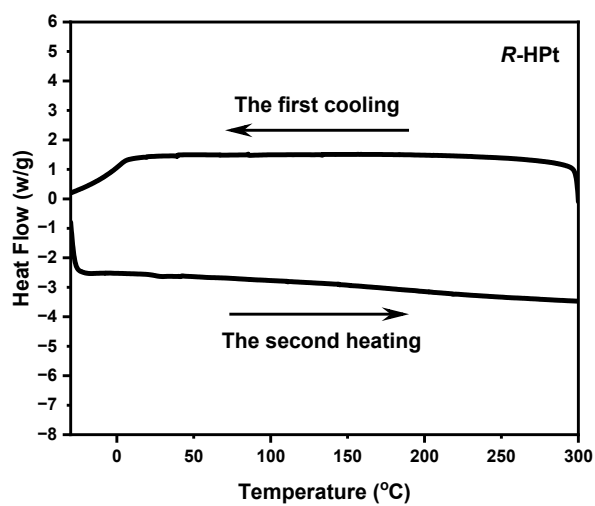

Fig. S15 DSC curves of *R*-HPt on the first cooling and the second heating.

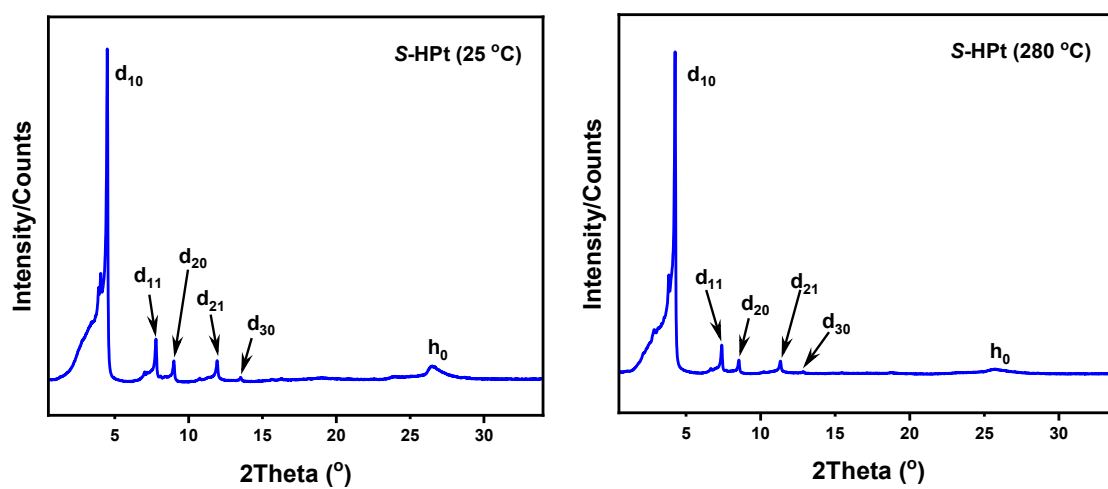

Fig. S16 XRD profiles of *S*-HPt at 25 °C and 280 °C on cooling.

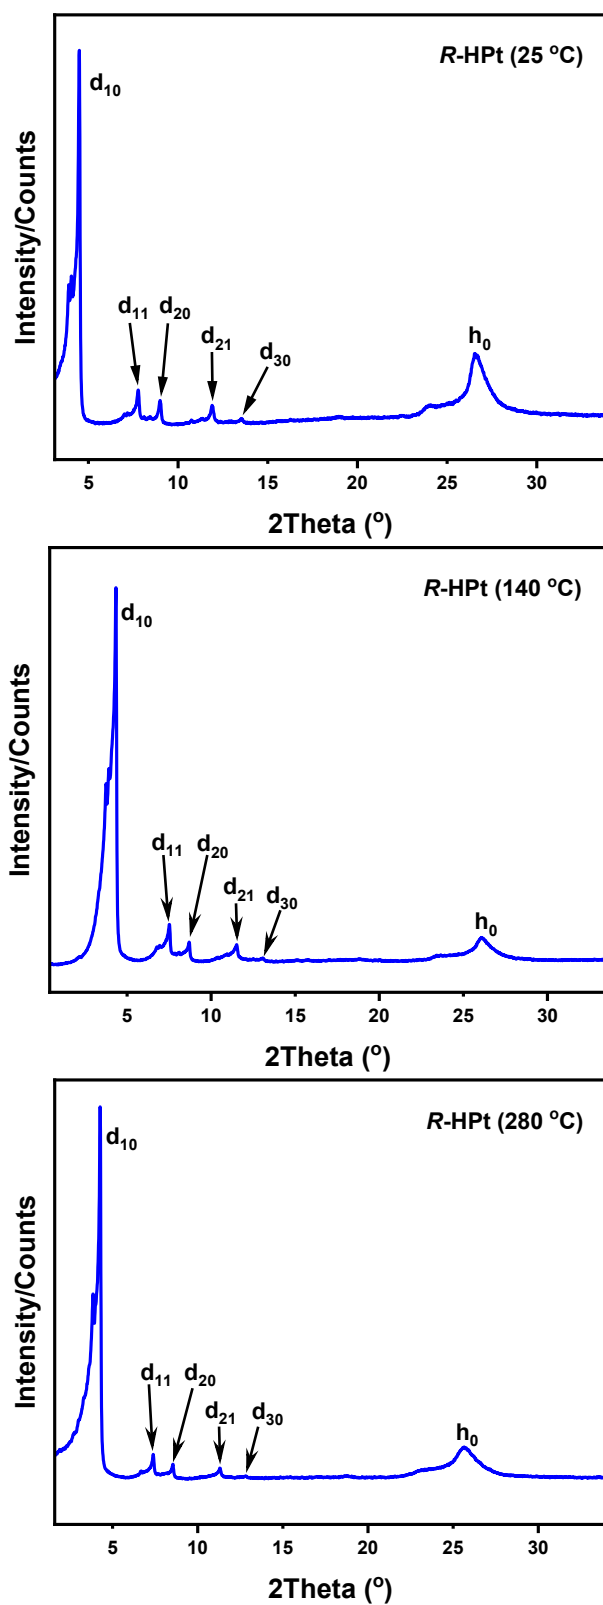

**Fig. S17** XRD profiles of **R-HPt** at 25 °C, 140 °C and 280 °C on cooling.

**Table S3** XRD data of *R/S*-HPt at different temperature on cooling.

| Complexes     | $T$ (°C) | Phase            | $q$ (1/nm) | $2\theta$ (°) | $d$ (Å) <sub>Mea</sub> <sup>[a]</sup> | $d$ (Å) <sub>Cal</sub> | hk <sup>[b]</sup> | Lattice constants (Å) <sup>[c]</sup> |
|---------------|----------|------------------|------------|---------------|---------------------------------------|------------------------|-------------------|--------------------------------------|
| <i>R</i> -HPt | 25       | Col <sub>h</sub> | 3.19       | 4.49          | 19.69                                 | 19.69                  | 10                | $a = 22.74$                          |
|               |          |                  | 5.52       | 7.78          | 11.38                                 | 11.37                  | 11                |                                      |
|               |          |                  | 6.38       | 9.01          | 9.84                                  | 9.85                   | 20                |                                      |
|               |          |                  | 8.43       | 11.89         | 7.45                                  | 7.44                   | 21                |                                      |
|               |          |                  | 9.57       | 13.52         | 6.56                                  | 6.56                   | 30                |                                      |
|               |          |                  | 18.66      | 26.53         | 3.36                                  | —                      | h <sub>0</sub>    |                                      |
|               | 140      | Col <sub>h</sub> | 3.08       | 4.34          | 20.39                                 | 20.39                  | 10                | $a = 23.53$                          |
|               |          |                  | 5.33       | 7.51          | 11.78                                 | 11.77                  | 11                |                                      |
|               |          |                  | 6.16       | 8.69          | 10.19                                 | 10.20                  | 20                |                                      |
|               |          |                  | 8.16       | 11.51         | 7.69                                  | 7.71                   | 21                |                                      |
|               |          |                  | 9.25       | 13.06         | 6.79                                  | 6.80                   | 30                |                                      |
|               |          |                  | 18.34      | 26.07         | 3.42                                  | —                      | h <sub>0</sub>    |                                      |
|               | 280      | Col <sub>h</sub> | 3.03       | 4.27          | 20.73                                 | 20.73                  | 10                | $a = 23.94$                          |
|               |          |                  | 5.24       | 7.39          | 11.98                                 | 11.97                  | 11                |                                      |
|               |          |                  | 6.06       | 8.54          | 10.36                                 | 10.37                  | 20                |                                      |
| 8.01          |          |                  | 11.29      | 7.84          | 7.83                                  | 21                     |                   |                                      |
| 9.09          |          |                  | 12.78      | 6.91          | 6.91                                  | 30                     |                   |                                      |
| 18.03         |          |                  | 25.65      | 3.48          | —                                     | h <sub>0</sub>         |                   |                                      |
| <i>S</i> -HPt | 25       | Col <sub>h</sub> | 3.18       | 4.49          | 19.75                                 | 19.75                  | 10                | $a = 22.75$                          |
|               |          |                  | 5.52       | 7.78          | 11.38                                 | 11.40                  | 11                |                                      |
|               |          |                  | 6.38       | 9.01          | 9.84                                  | 9.88                   | 20                |                                      |
|               |          |                  | 8.44       | 11.93         | 7.44                                  | 7.46                   | 21                |                                      |
|               |          |                  | 9.57       | 13.52         | 6.56                                  | 6.58                   | 30                |                                      |
|               |          |                  | 18.63      | 26.49         | 3.37                                  | —                      | h <sub>0</sub>    |                                      |
|               | 140      | Col <sub>h</sub> | 3.11       | 4.38          | 20.19                                 | 20.19                  | 10                | $a = 23.33$                          |
|               |          |                  | 5.39       | 7.59          | 11.65                                 | 11.66                  | 11                |                                      |
|               |          |                  | 6.22       | 8.75          | 10.11                                 | 10.10                  | 20                |                                      |
|               |          |                  | 8.23       | 11.63         | 7.63                                  | 7.63                   | 21                |                                      |
|               |          |                  | 9.31       | 13.14         | 6.75                                  | 6.73                   | 30                |                                      |
|               |          |                  | 18.42      | 26.19         | 3.41                                  | —                      | h <sub>0</sub>    |                                      |
|               | 280      | Col <sub>h</sub> | 3.02       | 4.26          | 20.79                                 | 20.79                  | 10                | $a = 23.94$                          |
|               |          |                  | 5.24       | 7.39          | 11.98                                 | 12.00                  | 11                |                                      |
|               |          |                  | 6.06       | 8.54          | 10.36                                 | 10.4                   | 20                |                                      |
| 8.02          |          |                  | 11.33      | 7.83          | 7.86                                  | 21                     |                   |                                      |
| 9.11          |          |                  | 12.86      | 6.89          | 6.93                                  | 30                     |                   |                                      |
| 18.04         |          |                  | 25.72      | 3.48          | —                                     | h <sub>0</sub>         |                   |                                      |

[a] Data from XRD measurements on cooling process. [b] Miller indices. [c] Lattice constants.

## 7. Chiroptical spectra of *R/S*-HPt

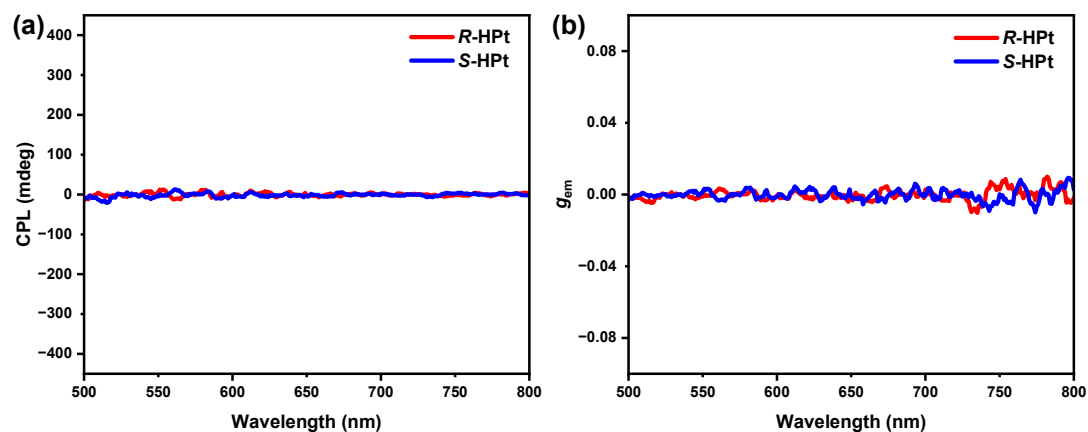**Fig. S18** Chiroptical spectra of *R/S*-HPt before thermal annealing (ATA) treatment.

## 8. SEM images of complexes *R/S*-HPt

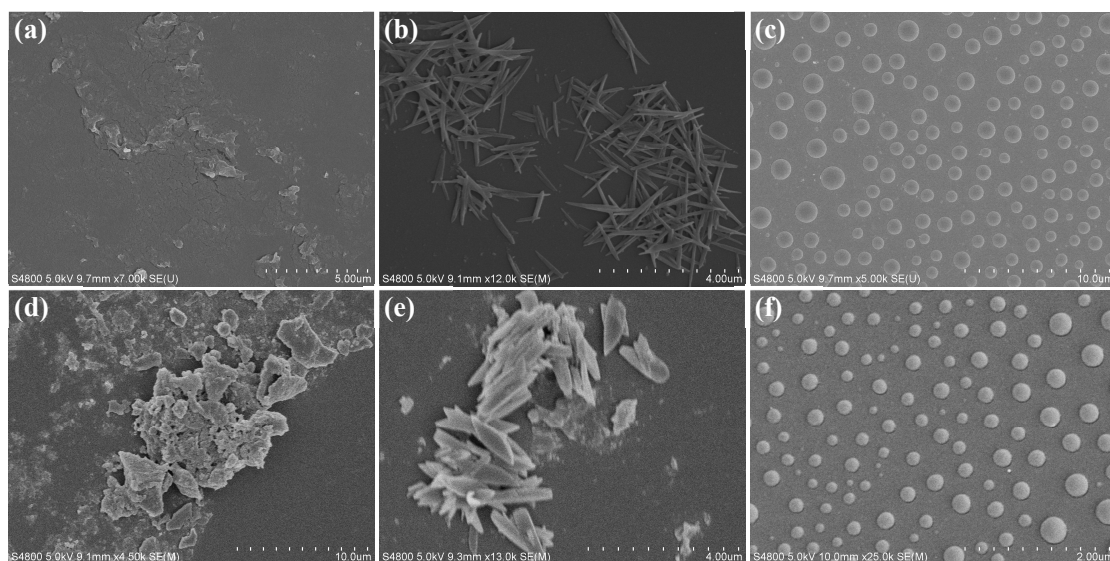

**Fig. S19** SEM images of chiral self-assemblies *R*-HPt (a–c) and *S*-HPt (d–f) before thermal annealing treatment. (a) and (d): film,  $1.0 \times 10^{-3} \text{ mol L}^{-1}$  in chloroform; (b) and (e): film,  $1.0 \times 10^{-4} \text{ mol L}^{-1}$  in chloroform; (c) and (f): aggregated state,  $1.0 \times 10^{-4} \text{ mol L}^{-1}$  in THF/H<sub>2</sub>O = 80/20 (v/v).

## 9. MD simulations data of *S*-HPt-C4

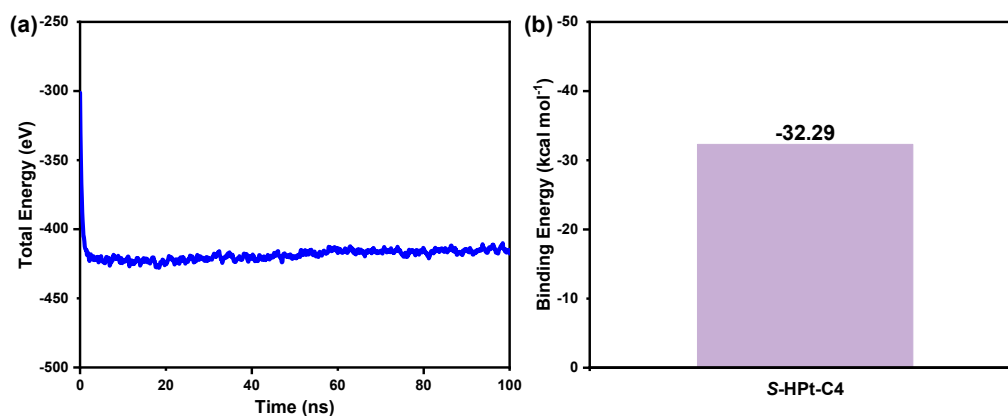

**Fig. S20** The total energy (a) and binding energy (b) of self-assemblies *S*-HPt-C4.

## 10. Cyclic voltammetry (CV) curves of complexes *R/S*-HPt

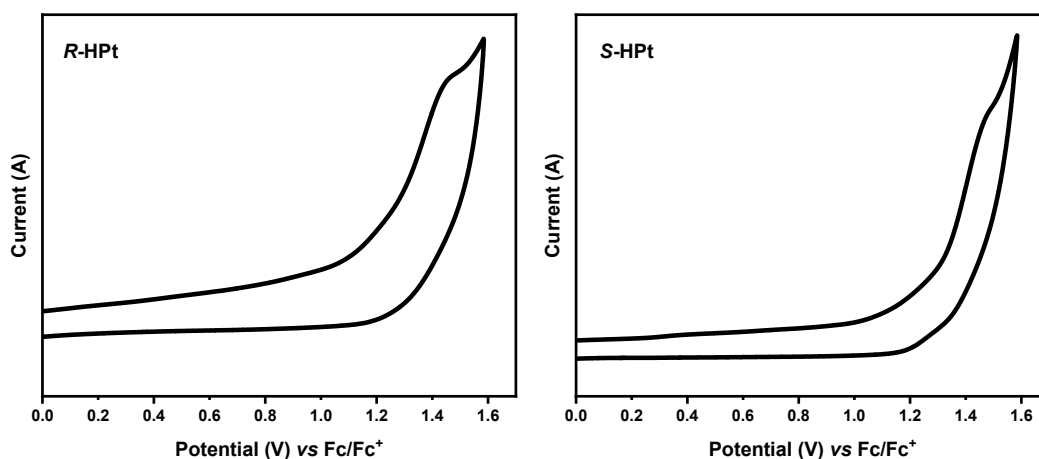

**Fig. S21** CV curves of complex *R/S*-HPt. CV data were measured in degassed  $\text{CH}_2\text{Cl}_2$  solution ( $M = 1.0 \times 10^{-3}$  mol/L) with Pt wire, Ag/AgCl electrode and glassy carbon as counter, reference, and working electrodes, respectively. The scan rate was 100 mV/s, and ferrocene was used as a reference.

**Table S4** The CV data of *R/S*-HPt.

|               | $E_g$ (eV) | $E_{\text{HOMO}}$ (eV) | $E_{\text{LUMO}}$ (eV) |
|---------------|------------|------------------------|------------------------|
| <i>R</i> -HPt | 3.10       | -5.68                  | -2.58                  |
| <i>S</i> -HPt | 3.10       | -5.71                  | -2.61                  |

$E_g = 1240/\lambda_{\text{edge}}$  (data calculated from the absorption band edge of the solution);  $E_{\text{HOMO}} = -(E_{\text{ox}} + 4.8)$  eV;  $E_{\text{LUMO}} = E_g + E_{\text{HOMO}}$ .

## 11. EL performance of homoleptic complex-based devices

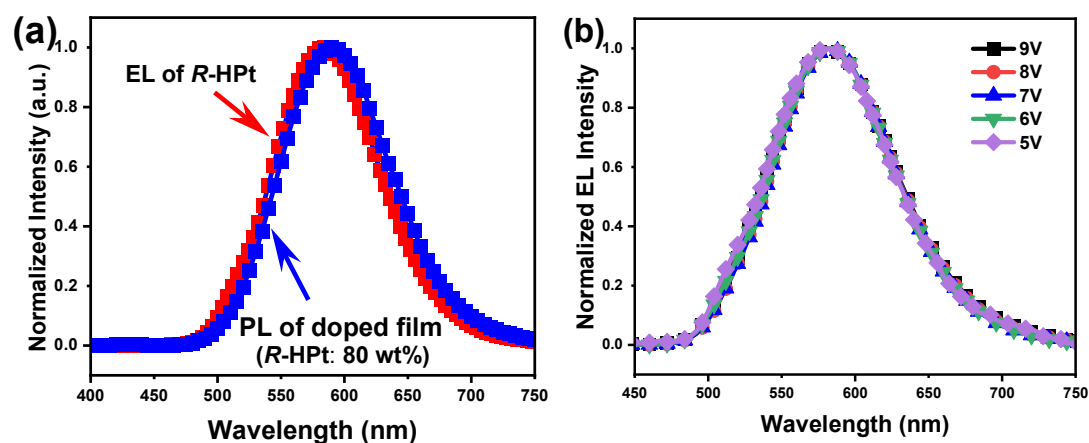

**Fig. S22** (a) The EL and PL spectra of *R*-HPt-based CP-EL device and doped film; (b) the EL spectra of *S*-HPt at different driving voltages.

**Table S5** Key performance data of *R/S*-HPT-based CP-OLEDs.

| Device        | $V_{\text{on}}$ (V) | $\lambda_{\text{EL}}$ (nm) | $L_{\text{max}}$ ( $\text{cd m}^{-2}$ ) | $\text{CE}_{\text{max}}$ ( $\text{cd A}^{-1}$ ) | EQE (%) | $g_{\text{EL}}$ | CIE (x, y)   |
|---------------|---------------------|----------------------------|-----------------------------------------|-------------------------------------------------|---------|-----------------|--------------|
| <i>R</i> -HPT | 3.7                 | 584                        | 10184                                   | 3.26                                            | 1.14    | 0.012           | (0.50, 0.49) |
| <i>S</i> -HPT | 3.6                 | 584                        | 11379                                   | 3.30                                            | 1.12    | -0.014          | (0.50, 0.49) |

$V_{\text{on}}$ : the turn-on voltage at a brightness of  $1 \text{ cd m}^{-2}$ ;  $g_{\text{EL}}$ : measured at  $\lambda_{\text{EL}} = 584 \text{ nm}$ .

**Table S6** Comparison of the luminance ( $L_{\text{max}}$ ) and electroluminescence dissymmetry factor ( $g_{\text{EL}}$ ) values for Pt(II) complex-based CP-EL devices.

| complex                                                                                                                                   | $\lambda_{\text{EL}}$ (nm) | $L_{\text{max}}$ ( $\text{cd m}^{-2}$ )    | $g_{\text{EL}}$        | Reference |
|-------------------------------------------------------------------------------------------------------------------------------------------|----------------------------|--------------------------------------------|------------------------|-----------|
| 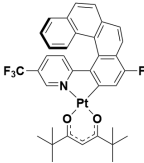                                                         | 612                        | 8424                                       | $-1.6 \times 10^{-3}$  | [24]      |
|                                                         | 600                        | 1062                                       | $1.20 \times 10^{-3}$  | [25]      |
|                                                        | 732                        | 0.007<br>$\text{W sr}^{-1} \text{ m}^{-2}$ | $-2.73 \times 10^{-3}$ | [26]      |
| <br>$R = \frac{1}{2} \text{C}_7\text{H}_{14}\text{-O}$ | $\sim 538$                 | 7150                                       | $6.0 \times 10^{-2}$   | [18]      |
|                                                        | 615                        | 374                                        | 0.38                   | [27]      |
|                                                        | 412                        | 637                                        | $10^{-4}$              | [28]      |
|                                                        | 504<br>544<br>586          | 1693                                       | $2.6 \times 10^{-3}$   | [29]      |

|                                                                                                                                                                                                                       |            |       |                        |           |
|-----------------------------------------------------------------------------------------------------------------------------------------------------------------------------------------------------------------------|------------|-------|------------------------|-----------|
| 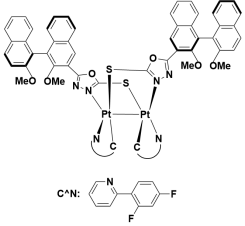 <p>C<sup>2</sup>N<sub>2</sub>: </p>                | 608        | 16106 | $-2.0 \times 10^{-3}$  | [30]      |
|  <p>R = <math>\text{C}_7\text{H}_{14}</math>-O-</p> | 503<br>542 | 2087  | $5.0 \times 10^{-3}$   | [31]      |
|                                                                                                                                      | 610        | 3955  | $-2.81 \times 10^{-3}$ | [32]      |
|  <p>R/S-HPt</p>                                                                                                                     | 584        | 11379 | -0.014                 | This work |



## 12. MALDI-TOF MS spectra of homoleptic Pt(II) complexes *R/S*-HPt

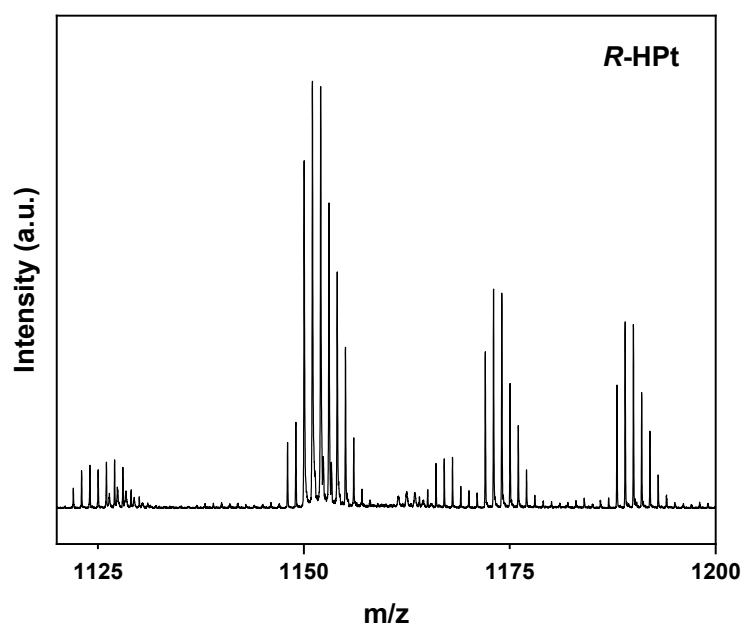

**Fig. S23** MALDI-TOF mass spectrum of complex *R*-HPt.

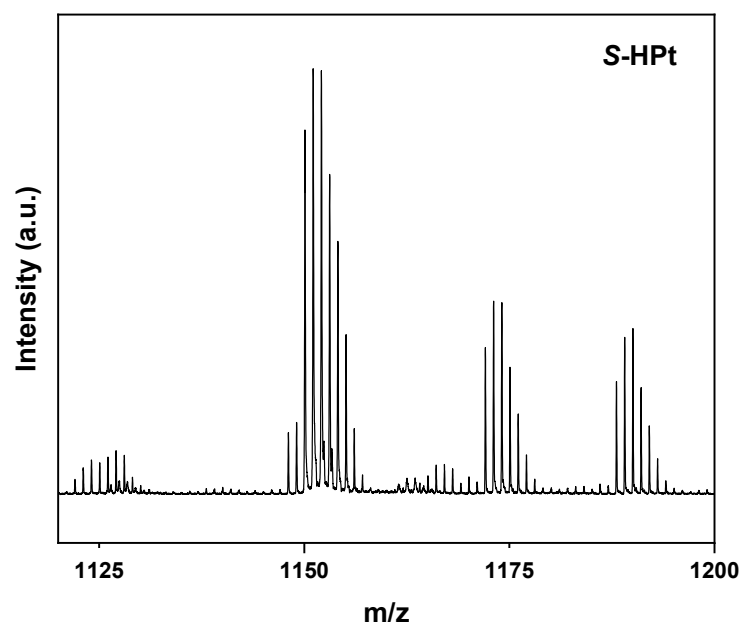

**Fig. S24** MALDI-TOF mass spectrum of complex *S*-HPt.

### 13. NMR spectra of homoleptic Pt(II) complexes *R/S*-HPt

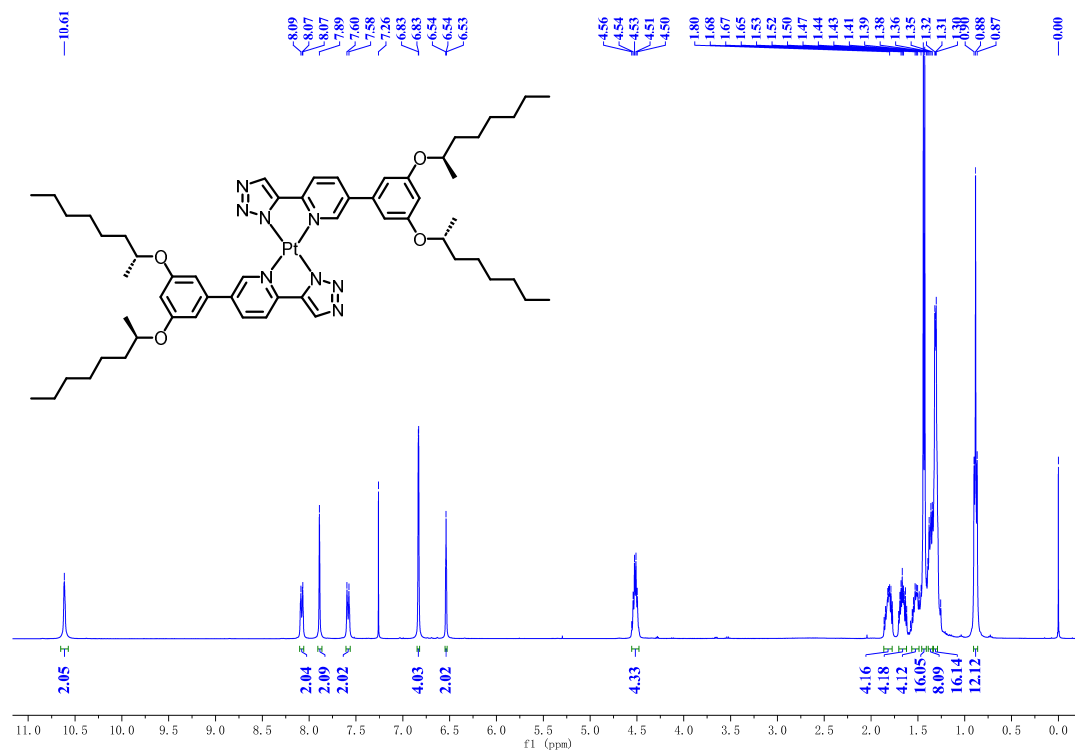

Fig. S25 <sup>1</sup>H NMR (500 MHz, CDCl<sub>3</sub>) spectrum of complex *R*-HPt.

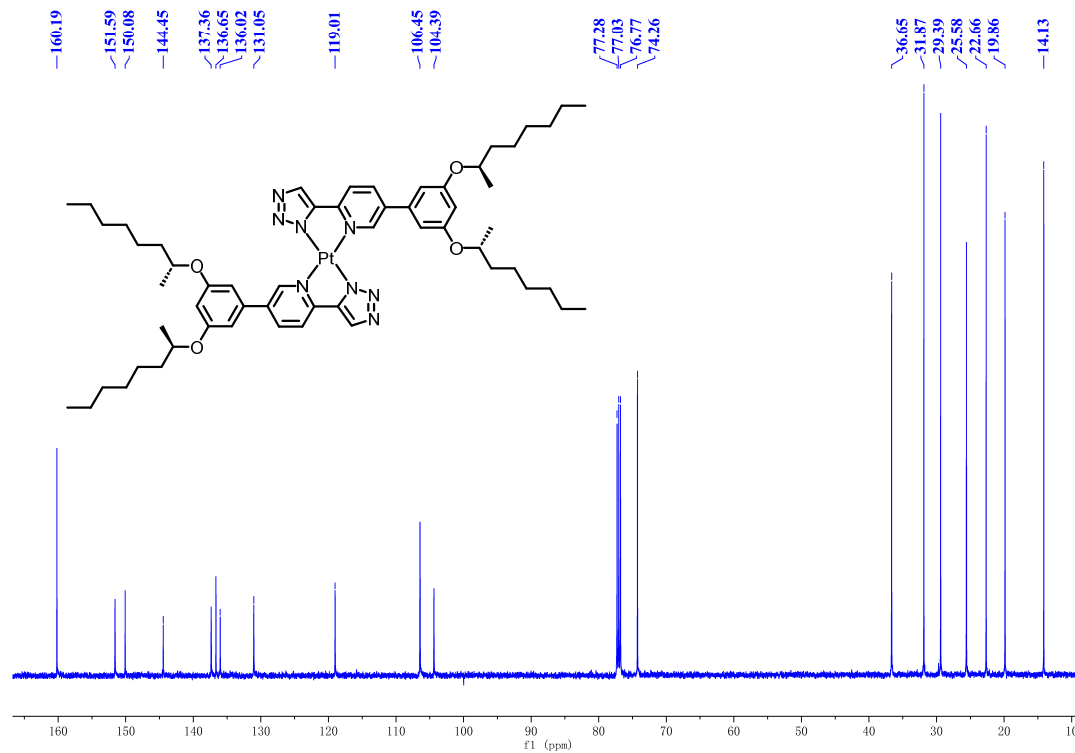

Fig. S26 <sup>13</sup>C NMR (126 MHz, CDCl<sub>3</sub>) spectrum of complex *R*-HPt.

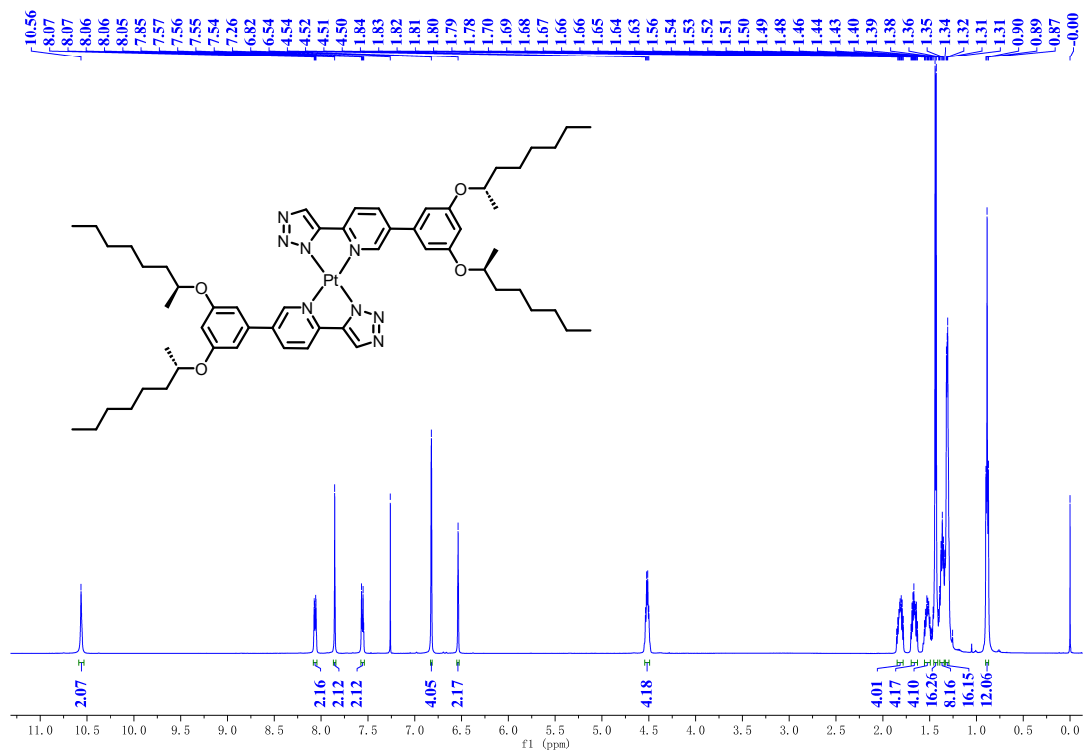

Fig. S27  $^1\text{H}$  NMR (500 MHz,  $\text{CDCl}_3$ ) spectrum of complex **S-HPt**.

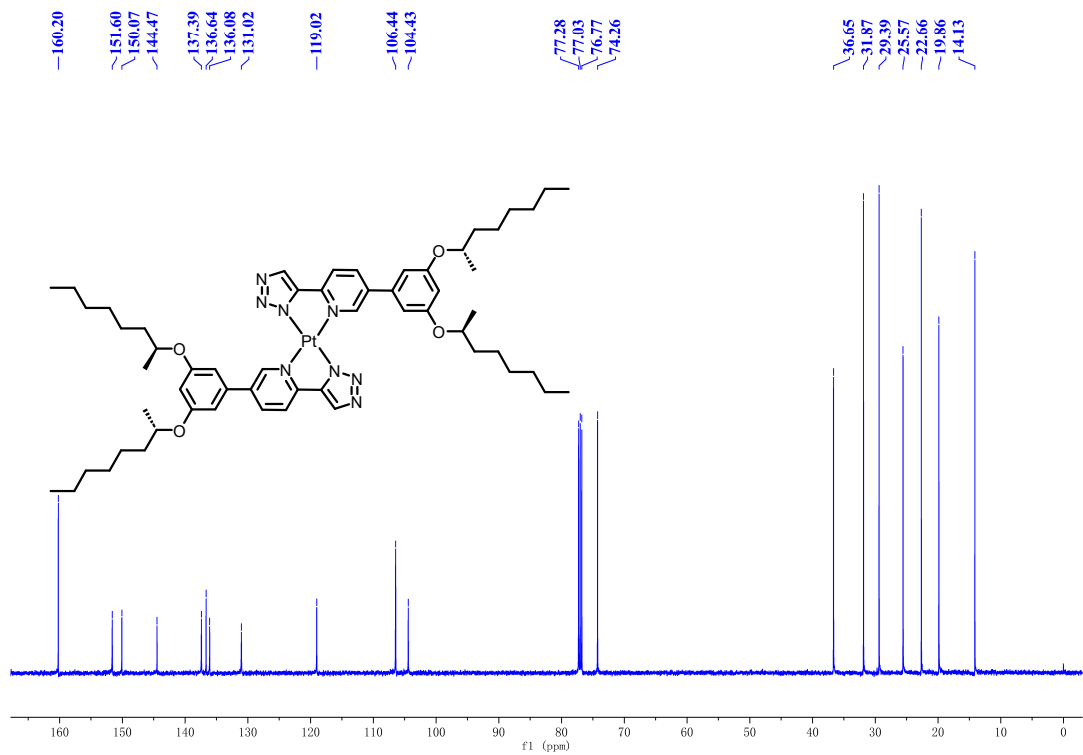

Fig. S28  $^{13}\text{C}$  NMR (126 MHz,  $\text{CDCl}_3$ ) spectrum of complex **S-HPt**.

## 14. HPLC spectra of homoleptic Pt(II) complexes *R/S*-HPt

<Chiral Chromatography Report of *R*-HPt>

|                |                                              |
|----------------|----------------------------------------------|
| Column         | CHIRALPAK IA (IA00CE-QE006)                  |
| Column size    | 4.6 mm $\phi$ $\times$ 250 mm                |
| Injection      | 10.0 $\mu$ L                                 |
| Mobile phase   | Hexane/THF = 80/20 (V/V)                     |
| Flow rate      | 1.0 mL/min                                   |
| Wavelength     | 300 nm                                       |
| Temperature    | 40 $^{\circ}$ C                              |
| HPLC equipment | Shimadzu SPD-20A; Daicel Chiralpak IA Column |
| Sample         | <i>R</i> -HPt                                |

<Chromatogram>

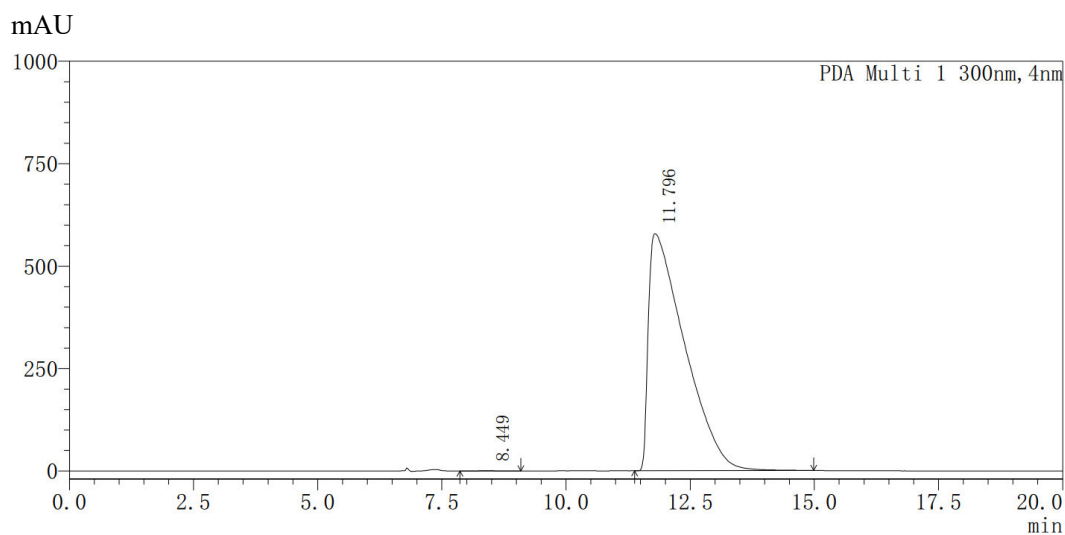

**Fig. S29** HPLC spectrum of homoleptic Pt(II) complex *R*-HPt.

<Peak Table>

PDA Ch1 300 nm

| Peak# | Start Time | End Time | Ret. Time | Area     | Area%   |
|-------|------------|----------|-----------|----------|---------|
| 1     | 7.861      | 9.088    | 8.449     | 9372     | 0.032   |
| 2     | 11.381     | 14.987   | 11.796    | 29403477 | 99.968  |
| Total |            |          |           | 29412849 | 100.000 |

<Chiral Chromatography Report of *S*-HPt>

|                |                                              |
|----------------|----------------------------------------------|
| Column         | CHIRALPAK IA (IA00CE-QE006)                  |
| Column size    | 4.6 mm $\phi$ $\times$ 250 mm                |
| Injection      | 10.0 $\mu$ L                                 |
| Mobile phase   | Hexane/THF = 80/20 (V/V)                     |
| Flow rate      | 1.0 mL/min                                   |
| Wavelength     | 300 nm                                       |
| Temperature    | 40 $^{\circ}$ C                              |
| HPLC equipment | Shimadzu SPD-20A; Daicel Chiralpak IA Column |
| Sample         | <i>S</i> -HPt                                |

<Chromatogram>

mAU

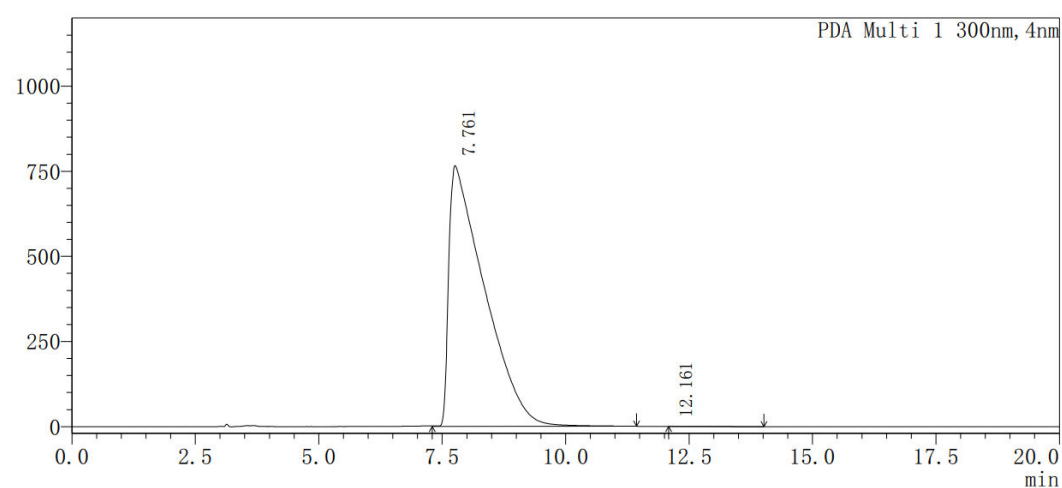

**Fig. S30** HPLC spectrum of homoleptic Pt(II) complex *S*-HPt.

<Peak Table>

PDA Ch1 300 nm

| Peak# | Start Time | End Time | Ret. Time | Area     | Area%   |
|-------|------------|----------|-----------|----------|---------|
| 1     | 7.296      | 11.435   | 7.761     | 38713308 | 99.991  |
| 2     | 12.085     | 14.016   | 12.161    | 3390     | 0.009   |
| Total |            |          |           | 38716699 | 100.000 |

## 15. References

- [1] Tuesuwan, B.; Kerwin, S. M. *Biochemistry-US* **2006**, *45*, 7265-7276.
- [2] Ishiyama, T.; Murata, M.; Miyaura, N. *J. Org. Chem.* **1995**, *60*, 7508-7510.
- [3] Sharpless, K. B.; Loren, J. C.; Krasinski, A.; Fokin, V. V. *Synlett* **2005**, *9*, 2847-2850.
- [4] Frisch, M. J. T., G. W.; Schlegel, H. B.; Scuseria, G. E.; Robb, M. A.; Cheeseman, J. R.; Scalmani, G.; Barone, V.; Petersson, G. A.; Nakatsuji, H.; Li, X.; Caricato, M.; Marenich, A. V.; Bloino, J.; Janesko, B. G.; Gomperts, R.; Mennucci, B.; Hratchian, H. P.; Ortiz, J. V.; Izmaylov, A. F.; Sonnenberg, J. L.; Williams, Ding, F.; Lipparini, F.; Egidi, F.; Goings, J.; Peng, B.; Petrone, A.; Henderson, T.; Ranasinghe, D.; Zakrzewski, V. G.; Gao, J.; Rega, N.; Zheng, G.; Liang, W.; Hada, M.; Ehara, M.; Toyota, K.; Fukuda, R.; Hasegawa, J.; Ishida, M.; Nakajima, T.; Honda, Y.; Kitao, O.; Nakai, H.; Vreven, T.; Throssell, K.; Montgomery Jr., J. A.; Peralta, J. E.; Ogliaro, F.; Bearpark, M. J.; Heyd, J. J.; Brothers, E. N.; Kudin, K. N.; Staroverov, V. N.; Keith, T. A.; Kobayashi, R.; Normand, J.; Raghavachari, K.; Rendell, A. P.; Burant, J. C.; Iyengar, S. S.; Tomasi, J.; Cossi, M.; Millam, J. M.; Klene, M.; Adamo, C.; Cammi, R.; Ochterski, J. W.; Martin, R. L.; Morokuma, K.; Farkas, O.; Foresman, J. B.; Fox, D. J. *Gaussian 16, Revision B.01 Gaussian, Inc., Wallingford CT, 2016*,
- [5] Stephens, P. J.; Devlin, F. J.; Chabalowski, C. F.; Frisch, M. J. *J. Phys. Chem.* **1994**, *98*, 11623-11627.
- [6] Marenich, A. V.; Cramer, C. J.; Truhlar, D. G. *J. Phys. Chem. B* **2009**, *113*, 6378-6396.
- [7] Lu, T.; Chen, F. *J. Comput. Chem.* **2012**, *33*, 580-592.
- [8] Grimme, S.; Antony, J.; Ehrlich, S.; Krieg, H. *J. Chem. Phys.* **2010**, *132*, 154104.
- [9] Johnson, E. R.; Becke, A. D. *J. Chem. Phys.* **2005**, *123*, 024101.
- [10] Becke, A. D.; Johnson, E. R. *J. Chem. Phys.* **2005**, *123*, 154101.
- [11] Johnson, E. R.; Becke, A. D. *J. Chem. Phys.* **2006**, *124*, 174104.
- [12] Grimme, S.; Ehrlich, S.; Goerigk, L. *J. Comput. Chem.* **2011**, *32*, 1456-1465.
- [13] Abraham, M. J.; Murtola, T.; Schulz, R.; Páll, S.; Smith, J. C.; Hess, B.; Lindahl, E. *SoftwareX* **2015**, *1-2*, 19-25.
- [14] Lindorff-Larsen, K.; Piana, S.; Palmo, K.; Maragakis, P.; Klepeis, J. L.; Dror, R. O.; Shaw, D. E. *Proteins: Struct., Funct., Bioinf.* **2010**, *78*, 1950-1958.
- [15] Martínez, L.; Andrade, R.; Birgin, E. G.; Martínez, J. M. *J. Comput. Chem.* **2009**, *30*, 2157-2164.
- [16] Berendsen, H. J. C.; Postma, J. P. M.; van Gunsteren, W. F.; DiNola, A.; Haak, J. R. *J. Chem. Phys.* **1984**, *81*, 3684-3690.
- [17] van Duijneveldt, F. B.; van Duijneveldt-van de Rijdt, J. G. C. M.; van Lenthe, J. H. *Chem. Rev.* **1994**, *94*, 1873-1885.
- [18] Qian, G.; Yang, X.; Wang, X.; Herod, J. D.; Bruce, D. W.; Wang, S.; Zhu, W.; Duan, P.; Wang, Y. *Adv. Opt. Mater.* **2020**, *8*, 2000775.
- [19] Prabhath, M. R. R.; Romanova, J.; Curry, R. J.; Silva, S. R. P.; Jarowski, P. D. *Angew. Chem. Int. Ed.* **2015**, *54*, 7949-7953.
- [20] Zou, G.; Zhao, L.; Zeng, L.; Luo, K.; Ni, H.; Wang, H.; Li, Q.; Yu, W.; Li, X. *Inorg. Chem.* **2019**, *58*, 861-869.
- [21] Wu, J.; Watson, M. D.; Zhang, L.; Wang, Z.; Müllen, K. *J. Am. Chem. Soc.* **2004**, *126*, 177-186.
- [22] Yasuda, T.; Shimizu, T.; Liu, F.; Ungar, G.; Kato, T. *J. Am. Chem. Soc.* **2011**, *133*, 13437-13444.
- [23] Jasiński, M.; Szymańska, K.; Gardias, A.; Pocięcha, D.; Monobe, H.; Szczytko, J.; Kaszyński, P. *ChemPhysChem* **2019**, *20*, 636-644.
- [24] Yan, Z.-P.; Luo, X.-F.; Liu, W.-Q.; Wu, Z.-G.; Liang, X.; Liao, K.; Wang, Y.; Zheng, Y.-X.; Zhou, L.; Zuo, J.-L.; Pan, Y.; Zhang, H. *Chem. Eur. J.* **2019**, *25*, 5672-5676.

- [25] Jiang, Z.; Wang, J.; Gao, T.; Ma, J.; Liu, Z.; Chen, R. *ACS Appl. Mater. Interfaces* **2020**, *12*, 9520-9527.
- [26] Fu, G.; He, Y.; Li, W.; Wang, B.; Lü, X.; He, H.; Wong, W.-Y. *J. Mater. Chem. C* **2019**, *7*, 13743-13747.
- [27] Brandt, J. R.; Wang, X.; Yang, Y.; Campbell, A. J.; Fuchter, M. J. *J. Am. Chem. Soc.* **2016**, *138*, 9743-9746.
- [28] Han, J.; Lu, H.; Xu, Y.; Guo, S.; Zheng, X.; Tao, P.; Liu, S.; Zhang, X.; Zhao, Q. *J. Organomet. Chem.* **2020**, *915*, 121240.
- [29] Han, J.; Wang, Y.; Wang, J.; Wu, C.; Zhang, X.; Yin, X. *J. Organomet. Chem.* **2022**, *973-974*, 122394.
- [30] Song, J.; Xiao, H.; Fang, L.; Qu, L.; Zhou, X.; Xu, Z.-X.; Yang, C.; Xiang, H. *J. Am. Chem. Soc.* **2022**, *144*, 2233-2244.
- [31] Fan, P.; Fang, Z.; Wang, S.; Dong, Q.; Xiao, C.; McEllin, A. J.; Bruce, D. W.; Zhu, W.; Wang, Y. *Chin. Chem. Lett.* **2023**, *34*, 107934.
- [32] Song, J.; Xiao, H.; Zhang, B.; Qu, L.; Zhou, X.; Hu, P.; Xu, Z.-X.; Xiang, H. *Angew. Chem. Int. Ed.* **2023**, *62*, e202302011.
